1 **Quantifying differences between passive and task-evoked intrinsic functional connectivity in**  
2 **a large-scale brain simulation**

3

4 Antonio Ulloa<sup>1,2\*</sup> and Barry Horwitz<sup>1</sup>

5

6 <sup>1</sup>Brain Imaging and Modeling Section, National Institute on Deafness and Other Communication

7 Disorders, National Institutes of Health, Bethesda, MD, USA

8 <sup>2</sup>Neural Bytes, Washington, DC, USA

9 \*Corresponding author

10 Email: antonio.ulloa@alum.bu.edu

11

12  
13  
14  
15  
16  
17  
18  
19  
20  
21  
22  
23  
24  
25  
26  
27  
28  
29  
30  
31  
32  
33

## Abstract

Establishing a connection between intrinsic and task-evoked brain activity is critical because it would provide a way to map task-related brain regions in patients unable to comply with such tasks. A crucial question within this realm is to what extent the execution of a cognitive task affects the intrinsic activity of brain regions not involved in the task. Computational models can be useful to answer this question because they allow us to distinguish task from non-task neural elements while giving us the effects of task execution on non-task regions of interest at the neuroimaging level. The quantification of those effects in a computational model would represent a step towards elucidating the intrinsic versus task-evoked connection. Here we used computational modeling and graph theoretical metrics to quantify changes in intrinsic functional brain connectivity due to task execution. We used our Large-Scale Neural Modeling framework to embed a computational model of visual short-term memory into an empirically derived connectome. We simulated a neuroimaging study consisting of ten subjects performing passive fixation (PF), passive viewing (PV) and delay match-to-sample (DMS) tasks. We used the simulated BOLD fMRI time-series to calculate functional connectivity (FC) matrices and used those matrices to compute several graph theoretical measures. After determining that the simulated graph theoretical measures were largely consistent with experiments, we were able to quantify the differences between the graph metrics of the PF condition and those of the PV and DMS conditions. Thus, we show that we can use graph theoretical methods applied to simulated brain networks to aid in the quantification of changes in intrinsic brain functional connectivity during task execution. Our results represent a step towards establishing a connection between intrinsic and task-related brain activity.

## 34 INTRODUCTION

35 Recently, there has been significant interest in investigating the relationship between intrinsic  
36 and task-evoked brain activity. This interest is driven by the potential to discover information  
37 contained in intrinsic brain activity that would reveal the repertoire of functional brain  
38 networks used to execute goal-directed tasks ([Cole, Bassett, Power, Braver, & Petersen, 2014](#)).  
39 Intrinsic and task-evoked activity are strongly interdependent ([Bolt, Anderson, & Uddin, 2017](#))  
40 and understanding this interdependence holds the promise of providing a link between resting  
41 state and task-based empirical findings ([Cole et al., 2014](#)). Furthermore, the establishment of a  
42 clear relationship between intrinsic and task brain activity would allow the mapping of task-  
43 related brain areas in patients unable to comply with such tasks ([Branco et al., 2016](#); [Liu et al.,](#)  
44 [2009](#))

45  
46 Neuroimaging studies have shown that performance of a cognitive task alters the intrinsic  
47 functional connectivity in non-task related brain regions ([Bluhm et al., 2011](#); [Tommasin et al.,](#)  
48 [2017](#); [Vatansever, Menon, Manktelow, Sahakian, & Stamatakis, 2015](#)). Bluhm and colleagues,  
49 for example, found increases in functional connectivity between two “default network” brain  
50 regions (posterior cingulate / precuneus and medial prefrontal cortex) and the rest of the brain  
51 during a visual working memory task as compared to a passive fixation task. In another study,  
52 Tommasin and colleagues found reductions in functional connectivity between brain regions  
53 within the “default mode network” (DMN) during an auditory working memory task as  
54 compared to an eyes-open resting state (RS) task. Similarly, Vatansever and colleagues found

55 reductions in functional connectivity within DMN brain regions during a motor task as  
56 compared to a RS task.

57 A very powerful tool that has been used to quantify changes in intrinsic functional connectivity  
58 due to task execution employs graph theoretical methods ([Adams, Shipp, & Friston, 2013](#); [Bolt,](#)  
59 [Nomi, Rubinov, & Uddin, 2017](#); [Cohen & D'Esposito, 2016](#); [Fuertinger, Horwitz, & Simonyan,](#)  
60 [2015](#); [Krienen, Yeo, & Buckner, 2014](#); [Moussa et al., 2011](#)). Graph theoretical metrics have been  
61 used in the last decade to study functional and structural brain networks as they provide ways  
62 to quantify both global network organization and local network properties ([Bolt, Nomi, et al.,](#)  
63 [2017](#); [Rubinov & Sporns, 2010](#)).

64

65 A recent computational study ([Lee, Bullmore, & Frangou, 2017](#)) demonstrated the reliability of  
66 graph theoretical metrics obtained from simulated intrinsic brain activity. Lee and colleagues  
67 modeled brain regions as Kuramoto oscillators coupled by weights extracted from a structural  
68 connectome ([Hagmann et al., 2008](#)). After finding an optimal functional connectivity matrix  
69 (one that resembled the RS empirical connectivity matrix), they set out to compute global and  
70 local network metrics and compared them to empirically-obtained graph metrics during the  
71 resting state. They found that simulated brain activity can be reasonably used to model graph  
72 theoretical metrics of brain organization.

73

74 However, there is a need to test the use of graph theoretical metrics on simulated intrinsic  
75 activity during task execution. We aimed to use computational modeling and graph theoretical  
76 metrics to quantify differences in intrinsic functional brain connectivity of non-task-related

77 brain regions due to increasing task demands. We used a large-scale computational model of  
78 visual processing ([Horwitz et al., 2005](#); [Tagamets & Horwitz, 1998](#); [Ulloa & Horwitz, 2016](#))  
79 embedded in a structural connectome ([Hagmann et al., 2008](#)) to examine differences in  
80 intrinsic neural activity between three conditions: passive fixation (PF), passive viewing (PV),  
81 and a visual delayed match-to-sample (DMS) task. Specifically, we set out to investigate  
82 whether computational modeling and graph theoretical metrics could be used to quantify and  
83 understand intrinsic neural activity changes in non-task brain regions due to increasing task  
84 demands.

85

## 86 **RESULTS**

87 To perform the current study, we embedded a biologically realistic model of visual short-term  
88 memory ([Tagamets & Horwitz, 1998](#)), shown in Figure 1, into an anatomical skeleton defined by  
89 a 998-node structural connectome ([Hagmann et al., 2008](#)), shown in Figure 2, using a blend of  
90 our large-scale neural model (LSNM) simulator ([Ulloa & Horwitz, 2016](#)) and the Virtual Brain  
91 (TVB) simulator ([Sanz Leon et al., 2013](#)). The visual short-term memory model comprises brain  
92 regions that are directly involved in performing a delayed match-to-sample (DMS) task for  
93 visual objects. The structural connectome was added to provide neural noise to the simulated  
94 neural activity during the DMS task, and in return, to receive inputs back from the DMS task  
95 nodes. We have described our framework in a previous paper ([Ulloa & Horwitz, 2016](#)) where  
96 we focused on the fMRI BOLD signal generation during the DMS task. In the current work, we  
97 sought to analyze the FC configurations in brain regions not driving task execution. These ‘non-  
98 task’ brain regions exhibit intrinsic activity and because of their reciprocal connections with

99 task-specific brain regions, their neural activity can potentially be modulated during task  
100 execution.

101  
102 We generated ten virtual subjects by randomly varying the connection weights among brain  
103 regions in the structural visual model (see Methods section for details). We created three  
104 experimental conditions: passive fixation (PF), during which simulated subjects with a low “task  
105 signal” (roughly equivalent to subjects’ attention level during task execution, but see Methods  
106 for definition of this parameter) are fixating on a small dot; passive viewing (PV), during which  
107 subjects passively look at visual shapes; and a DMS task, during which subjects compared two  
108 shapes presented within 1.5 seconds of each other and responded whether the second shape  
109 matched the memory of the first. Each simulated subject performed one 198-second  
110 experiment that consisted of 3-trial blocks interspersed with rest blocks (see Methods section  
111 for details).

112  
113 **Changes in BOLD activity of non-task brain regions due to different task conditions.**  
114 Figure 3 shows typical (averaged across neuronal populations within each brain region)  
115 neuronal activity for each condition for task-related brain regions during one trial. Figure 3  
116 shows the task regions increasing activity due to both stimuli presentation (V1, V4, IT, PF),  
117 short-term memory maintenance (D1, D2), and response (FR). This increase occurs in the PV  
118 and DMS conditions (green and red lines) but not in the PF condition (blue line). Thus, the  
119 stimulus used in the PF condition (a small dot) does not generate visible changes in the  
120 neuronal activity of task regions. The details of the task-related responses shown in Figure 3

121 have been discussed in detail in previous papers ([Horwitz et al., 2005](#); [Ulloa & Horwitz, 2016](#)).

122 Figure 4 shows the BOLD signal averaged across those brain regions with direct anatomical

123 connections to task regions. Figure 2 shows a graphical depiction of the non-task nodes that are

124 directly connected to task nodes. Notice how BOLD activity increases during the task blocks

125 (shaded areas) and how they do so more prominently during DMS than during PV and during PV

126 than during PF. Also notice how that BOLD activity change is larger for some of the brain

127 regions with direct connections to IT, FS, D1, D2, FR than those regions with direct connections

128 to V1 and V4. This is due to variations in the strength of the connecting weights from task-

129 related nodes to non-task nodes. As we can see in Figure 4, changes in all task-related brain

130 regions correlate with BOLD signal changes in non-task brain regions directly connected to

131 them.

132

### 133 **Intrinsic FC differences between PF, PV and DMS conditions.**

134 We computed FC matrices for the three simulated conditions and for all subjects. Figure 5

135 shows across-subject averages of FC matrices for the three conditions. Figure 6 shows scatter

136 plots between PF and PV and between PF and DMS conditions. As shown in Figure 6, the

137 correlation coefficients between PF and both PV and DMS were high (0.90 and 0.83,

138 respectively), demonstrating only small differences in the pair-wise consistency of functional

139 connections across conditions. As noted above, these correlation matrices consist only of

140 connectome nodes (e.g., no LSMN task-based nodes were used to construct these matrices). In

141 summary, there were small changes in the pair-wise functional connectivity between PF and PV

142 and between PF and DMS conditions.

143

144 **Graph theoretical metrics of PF, PV, and DMS conditions.**

145 Using graph theoretical methods ([Rubinov & Sporns, 2010](#)), we computed eight network  
146 metrics (see Methods section for definition of each metric): global and local efficiencies,  
147 average clustering coefficient, characteristic path length, eigenvector centrality, betweenness  
148 centrality, participation coefficient, and modularity. We calculated these metrics using  
149 weighted FC matrices for a range of plausible threshold densities ([Di, Gohel, Kim, & Biswal,](#)  
150 [2013](#)). Figure 7 shows across-subject averages of those metrics for a range of network densities  
151 ([Di et al., 2013](#)). Figure 7 shows that as the task changed from PF to PV to DMS, there was an  
152 increase in global efficiency, local efficiency, average clustering coefficient and average  
153 betweenness centrality (mostly at the lowest threshold studied, 5%), and modularity.  
154 Conversely, as the task changed from PF to PV to DMS, there was a decrease in average  
155 characteristic path length, average eigenvector centrality, and average participation coefficient.

156

157 **Differences in graph metrics between PF and PV and between PF and DMS.**

158 For each graph metric obtained, we computed the relative difference (see Methods section for  
159 details) between PF and PV and between PF and DMS (see Figure 8). We observed significant  
160 differences between PF and PV and between PF and DMS in modularity ( $54.2 \pm 8\%$  and  $81.3 \pm$   
161  $11.6\%$ , respectively), eigenvector centrality ( $16.3 \pm 1.7\%$  and  $22.1 \pm 1.8\%$ , respectively) and  
162 clustering coefficient ( $7.9 \pm 1.3\%$  and  $12.7 \pm 2\%$ ); smaller changes in global efficiency ( $1.7 \pm$   
163  $0.2\%$  and  $2.4 \pm 0.3$ ), local efficiency ( $2.2 \pm 0.3\%$  and  $3.2 \pm 0.4\%$ ), characteristic path length ( $1.7$



164  $\pm 0.1\%$  and  $2.3 \pm 0.3\%$ ), betweenness centrality ( $1.6 \pm 0.3\%$  and  $2.6 \pm 0.4\%$ ), and participation  
165 coefficient ( $0.2 \pm 0.1\%$  and  $0.4 \pm 0.1\%$ ).

166

### 167 **Differences in modularity between conditions.**

168 To further visualize the large differences in modularity configurations during the three  
169 simulated conditions, we rendered the binary FC network in each condition as connection space  
170 graphs using Gephi ([Bastian, Heymann, & Jacomy, 2009](#)); [www.gephi.org](http://www.gephi.org)). We used the  
171 algorithm of Blondel et al ([Blondel, Guillaume, Lambiotte, & Lefebvre, 2008](#)) to find the  
172 modularity at a density threshold of 10%. Figure 10 shows connection space graphs displayed  
173 on a radial axis layout (axis have a slight spiral to improve visualization of inter-module  
174 connectivity). Nodes that belong to the same module are represented by the same color and  
175 group together on the same radial axis. The connections between nodes have the color of the  
176 node where those connections originate. We can see a decrease in the number of modules,  
177 from 8 in PF to 6 in PV to 3 in DMS and an increase in modularity (see increase in modularity  
178 graph in Figure 7). The increase in modularity from PF to PV to DMS means that the functional  
179 network rearranges itself into fewer modules with more functional connections between nodes  
180 within the same module (compare the very clearly defined modules in DMS versus PF and DMS  
181 versus PV in Figure 10). We emphasize again that these results refer to non-task related nodes.

182

### 183 **DISCUSSION**

184 Using a large-scale computational model of visual short-term memory embedded into an  
185 anatomical connectome, we compared simulated intrinsic brain activity of non-task related

186 brain regions during three tasks: passive fixation (PF), during which simulated subjects with a  
187 low “task signal” or “attention” level are fixating on visual stimuli (a small dot); passive viewing  
188 (PV), during which subjects passively watch changing visual shapes but take no action; and a  
189 DMS task, during which subjects compared two shapes presented within 1.5 seconds of each  
190 other and responded whether the second shape matched the memory of the first. The PF  
191 condition may be considered equivalent to a resting state condition as a passive fixation task  
192 has been often used in RS fMRI studies. The key difference between the PF and the PV  
193 conditions was that the stimulus during the PF condition was an unchanging small dot whereas  
194 in the PV condition several different and larger stimuli were presented. The key difference  
195 between the PV and the DMS conditions was the level of the “task” or attention signal, which  
196 was set to a low level in the PV condition and to a high level during the DMS condition. As  
197 discussed in the Methods section, the task signal level determines whether an input stimulus is  
198 going to be retained in short-term memory ([Horwitz et al., 2005](#)). Additionally, because of  
199 feedback connections from D1 in prefrontal cortex to IT and V4 (see model diagram in Figure 1),  
200 the task signal level indirectly influences neuronal activity in V1, V4, and IT (compare neuronal  
201 activity in V1, V4, and IT during different conditions in Figure 3).

202  
203 To quantify differences between PF, PV and DMS conditions, we used pair-wise temporal  
204 Pearson correlations (FC matrices) and graph theory metrics of fMRI FC matrices. Whereas we  
205 found small differences between the FC matrices of the simulated conditions, these differences  
206 we not particularly impressive. However, we found clear-cut differences in each of the graph  
207 theory metrics: Graded increases from PF to PV to DMS in global efficiency, local efficiency,

208 clustering coefficient, betweenness centrality and modularity; and graded decreases in the  
209 from PF to PV to DMS in characteristic path length, eigenvector centrality, and average  
210 participation coefficient. Our simulated graph theory results largely agreed with empirical  
211 studies.

212  
213 In our computer simulations, the intrinsic brain activity across different conditions is modulated  
214 by ongoing neural activity in brain regions engaged in each task (task brain regions). This  
215 modulation happens through the strength of the anatomical connections of those brain regions  
216 to the rest of the brain (non-task brain regions, see Figure 2).

217  
218 When the brain engages in a behavioral task, the activity in neuronal populations driving the  
219 task has the potential of reverberating throughout the brain, thereby altering the intrinsic  
220 neural activity of neuronal populations not involved in the task. A crucial question is whether  
221 one can quantify those changes in intrinsic functional connectivity. Computational modeling  
222 can be useful in this regard, as it allows us to isolate non-task from task neuronal populations  
223 and to convert simulated synaptic activity into neuroimaging time-series which in turn can be  
224 converted to FC matrices.

225  
226 A commonly used method to simulate the resting state is by modeling local neuronal  
227 populations with oscillators and using the structural connections obtained from diffusion  
228 tractography as connection weights between the model neuronal populations. A parameter  
229 search is then conducted to find a global coupling parameter and a white matter conduction

230 speed producing a simulated FC matrix that best matches an empirical FC matrix ([Cabral,](#)  
231 [Hugues, Sporns, & Deco, 2011](#); [Ghosh, Rho, McIntosh, Kotter, & Jirsa, 2008](#); [Gilson, Moreno-](#)  
232 [Bote, Ponce-Alvarez, Ritter, & Deco, 2016](#); [Hansen, Battaglia, Spiegler, Deco, & Jirsa, 2015](#);  
233 [Honey et al., 2009](#); [Lee et al., 2017](#); [Roy et al., 2014](#); [Sanz-Leon, Knock, Spiegler, & Jirsa, 2015](#)).

234 This is the method we used to generate intrinsic activity in the “rest of the brain” of our  
235 simulations.

236

### 237 **Consistency of pair-wise functional connectivity across task conditions**

238 There was a high correlation between the pairs in the FC connectivity matrices between PF and  
239 PV and between PF and DMS (Figure 6). Several researchers have used pair-wise spatial  
240 correlations between functional connectivity (FC) matrices to compare intrinsic to task-evoked  
241 conditions ([Bolt, Nomi, et al., 2017](#); [Buckner et al., 2009](#); [Cohen & D'Esposito, 2016](#); [Cole et al.,](#)  
242 [2014](#); [Di et al., 2013](#); [Krienen et al., 2014](#); [Smith et al., 2009](#)). Generally, there is a relatively high  
243 spatial correlation (i.e., 0.64 – 0.9) between a passive condition (such as visual fixation or eyes  
244 closed, which are often used to study intrinsic brain activity) and a task condition. Despite such  
245 high correlations, differences do exist between passive and task FC, and those differences may  
246 be attributable to functional modifications that allow the brain to focus on performing a given  
247 task ([DeSalvo, Douw, Takaya, Liu, & Stufflebeam, 2014](#); [Di et al., 2013](#); [Tomasi, Wang, Wang, &](#)  
248 [Volkow, 2014](#)).

249

250 Bolt and colleagues ([Bolt, Nomi, et al., 2017](#)) recently showed that one can have largely  
251 consistent FC between passive and task conditions, and at the same time have largely different

252 whole-brain graph theoretical metrics between passive and task conditions. However, a  
253 description of the mechanisms behind those seemingly divergent results has not yet been  
254 provided.

255

### 256 **Increases in Global Efficiency**

257 Our study resulted in higher global efficiency for DMS than for PV and for PV than for PF. During  
258 the simulated PF condition, the stimuli used is small and mostly activates V1/V2 and V4 and IT  
259 areas to a small degree (blue lines in Figure 3), During the PV condition, the larger stimuli used  
260 causes an increase of neuronal activity in V1/V2, V4, IT, FS, D1, D2, FR (as shown in the trial  
261 time-series of Figure 3, green lines), thereby contributing to an increase in neuronal activity of  
262 non-task nodes directly connected to task nodes (see green lines in the shaded areas of the  
263 time-series in Figure 4). During the DMS condition, the neuronal activity across the task brain  
264 regions is higher than during the PV condition (red lines in Figure 3). This increase in neuronal  
265 activity of task brain regions contributes to an increase in neuronal activity of several of the  
266 non-task brain regions with direct connections to task regions during PV and DMS conditions as  
267 compared to PF condition (see Figure 4). As shown in the FC matrices of Figure 5, there is an  
268 increase in the correlation of several pair-wise connections from PF to PV to DMS. This increase  
269 in functional connectivity contributed to a consistent increase in global efficiency from PF to PV  
270 to DMS (Figure 7).

271

272 Graph theoretical measures in empirical studies have consistently shown higher global  
273 efficiency during task than during passive conditions (although this could depend on the

274 complexity of the task, but see (Cohen and D'Esposito 2016)). The global efficiency has been  
275 found to be higher during a task than during passive fixation ([Bolt, Nomi, et al., 2017](#); [Cohen &](#)  
276 [D'Esposito, 2016](#)), higher during a task than during an eyes closed condition ([Fuertinger et al.,](#)  
277 [2015](#)), greater during a one-back visual memory task than during passive viewing and an eyes  
278 closed condition ([Wen et al., 2015](#)), and higher for coactivation studies than during RS ([Di et al.,](#)  
279 [2013](#)). In our simulations, the global efficiency is higher during DMS than during PV and PV. This  
280 is due to the short-memory task causing an increase of neural activity in brain regions that are  
281 in turn connected to a widely distributed network in the rest of the brain.

282

### 283 **Increases in Local efficiency**

284 Our simulations showed a greater local efficiency for DMS than for PV and for DMS than for PF.  
285 This is consistent with empirical studies showing an increase in local efficiency with increasing  
286 task demands ([Wen et al., 2015](#)).

287

### 288 **Increases in Clustering Coefficient**

289 Our simulations showed a greater clustering coefficient during DMS than during PV and during  
290 PV than during PF. Previous empirical studies have found a clustering coefficient that is greater  
291 for task than during passive fixation ([Bolt, Nomi, et al., 2017](#)), lower during a blend of activation  
292 studies than during resting state ([Di et al., 2013](#)), and greater during a language task than  
293 during eyes closed ([Fuertinger et al., 2015](#)).

294

### 295 **Increases in characteristic path length**

296 Our simulations showed smaller characteristic path length during DMS than during PV and  
297 during PV than during PF. This is to be expected because as the global efficiency increases, the  
298 characteristic path length decreases.

299

### 300 **Decreases in mean Eigenvector Centrality**

301 Our simulations showed smaller eigenvector centrality during DMS than during PV and during  
302 PV than during PF. The eigenvector centrality metric provides a measure of how well connected  
303 a given node is considering how well connected that node's neighbors are. Thus, eigenvector  
304 centrality is recursive because a given node's eigenvector centrality depends on the node's  
305 neighbors' eigenvector centrality. To get a more detailed view of the reason behind smaller  
306 mean eigenvector centrality for more complex tasks (Figure 7), we rendered the eigenvector  
307 centrality for each node on axial and sagittal views of the brain (Figure 9A). Figure 9A shows  
308 that as the task complexity increases (from PF to PV to DMS) the eigenvector centrality  
309 increases in a few nodes and decreases in most other nodes. Thus, on average the eigenvector  
310 centrality decreases but the nodal eigenvector centrality in a few nodes increases as the task  
311 complexity increases. Note that several of the nodes in which the eigenvector centrality  
312 increases during PF and DMS are the nodes that are directly connected to task nodes (compare  
313 to Figure 2). The reason the increases are concentrated on the right side of the brain is due to  
314 the task nodes, which are embedded in the right side of the brain, having direct connections  
315 mostly to the right side of the brain (see Figure 2). Compare the changes in eigenvector  
316 centrality with the changes in betweenness centrality (Figure 7) which remain almost the same  
317 during PF, PV and DMS (Figure 9B).

318

### 319 **Increases in Betweenness Centrality**

320 Our simulations show a higher betweenness centrality at the lower density threshold (5%) but  
321 the average betweenness centrality is very similar across all the other density thresholds  
322 (Figure 7). As mentioned above, the betweenness centrality at each individual node (Figure 9B)  
323 remains relatively constant across conditions. Previous empirical studies have shown a  
324 difference in nodal centrality when resting state and task are compared ([Di et al., 2013](#)).

325

### 326 **Decreases in Participation Coefficient**

327 Our simulations showed greater participation coefficient (in a predefined set of modules) for PF  
328 than for PV and for PV than for DMS (Figure 7). Participation coefficient measures each node  
329 participation in a set of predefined modules. We used the modules defined by Hagmann et al  
330 ([Hagmann et al., 2008](#)). Previous studies have shown a higher participation coefficient  
331 (between-module connectivity) during passive fixation than during a semantic task ([DeSalvo et](#)  
332 [al., 2014](#)).

333

### 334 **Increases in Modularity**

335 Our simulations showed a smaller modularity for PF than for PV and for PF than for DMS. Some  
336 empirical studies have found a greater modularity metric during RS than during a blend of  
337 activation studies ([Di et al., 2013](#)), and a greater modularity during passive fixation than during  
338 an n-back task using visually-presented phonemes ([Cohen & D'Esposito, 2016](#)). However, Cohen  
339 et al ([Cohen & D'Esposito, 2016](#)) found a similar modularity during passive fixation and a finger



340 tapping task. Other empirical studies have found that that the modularity varies as a function of  
341 performance, but here the evidence is also inconsistent. For example, Stevens et al ([Stevens,](#)  
342 [Tappon, Garg, & Fair, 2012](#)) found a positive correlation between RS modularity and visual  
343 working memory capacity and Meunier et al ([Meunier et al., 2014](#)) found a negative correlation  
344 between modularity and memory scores in an odor recognition task. Additionally, Yue et al ([Yue](#)  
345 [et al., 2017](#)) have found significant individual variability in modularity during resting state.

346

347 **Related computational studies comparing resting state and task-based functional**  
348 **connectivity.**

349 Two previous computational approaches have compared the intrinsic brain activity obtained  
350 during resting state versus the one obtained during task; however, none of those models was  
351 specifically concerned with quantifying intrinsic activity differences between different task  
352 conditions (which is the goal of our paper). The first one of those studies, by Ponce-Alvarez and  
353 colleagues ([Ponce-Alvarez, He, Hagmann, & Deco, 2015](#)) simulated RS using a set of mean field  
354 equations (excitatory-inhibitory pairs) interconnected by the anatomical connections of a 66-  
355 node connectome. A visual task was approximated by applying external stimulation (stationary  
356 inputs) to visual nodes during the RS simulation. Ponce-Alvarez's model revealed a decreased  
357 synaptic activity variability during the visual task as compared to the RS condition.

358

359 The second computational study comparing task versus rest ([Cole, Ito, Bassett, & Schultz, 2016](#))  
360 similarly applied stationary inputs to a set of neighboring nodes in a simplified computational  
361 model to simulate six different tasks. Cole and colleagues used the FC strengths during a

362 passive task to predict the fMRI task activation of a held-out brain region. They did this for each  
363 one of the brain areas simulated to produce a prediction of the fMRI activity in each one of the  
364 brain areas simulated given a passive task FC matrix.

365

### 366 **Caveats and limitations of our study**

367 Different passive experimental conditions have been used in neuroimaging to study intrinsic  
368 brain activity (also referred to as the “resting state (RS)”) ([Biswal, Yetkin, Haughton, & Hyde, 1995](#);  
369 [Fox, Corbetta, Snyder, Vincent, & Raichle, 2006](#); [Greicius, Krasnow, Reiss, & Menon, 2003](#)). Three of the conditions most commonly used as a resting state condition are passive  
370 fixation (PF), eyes open with no fixation, and eyes closed. Yan and colleagues ([Yan et al., 2009](#))  
371 found significantly higher FC in Default Mode Network (DMN) brain areas during eyes open  
372 than during eyes closed condition. It is also important to emphasize that the functional  
373 magnetic resonance (fMRI) results can vary depending on several other factors including: how a  
374 RS task is defined ([Van Dijk et al., 2010](#); [Yan et al., 2009](#)), which task instructions are given to  
375 subjects ([Benjamin et al., 2010](#)), and whether subjects were engaged in a task prior to RS  
376 ([Waites, Stanislavsky, Abbott, & Jackson, 2005](#)). Thus, whereas one can compare (within the  
377 limitations outlined below) the results of our study with empirical studies using passive fixation,  
378 our results cannot be directly extrapolated to all RS-fMRI studies.

380

381 One way in which the simulations presented here are different from our previous paper ([Ulloa  
382 & Horwitz, 2016](#)) is that the model response units have been relocated from prefrontal cortex  
383 to PreSMA. The relocation of the response units to PreSMA is based on an fMRI study by

384 ([Pessoa, Gutierrez, Bandettini, & Ungerleider, 2002](#)), who found an increase in BOLD fMRI in  
385 the PreSMA area at the end of the delay period during a visual working memory task.  
386 Additionally, a study by ([Petit, Courtney, Ungerleider, & Haxby, 1998](#)) has also demonstrated  
387 BOLD fMRI activity in the PreSMA area during a working memory task. The relocation from  
388 previous studies from our lab of the model response units to PreSMA makes biological sense as  
389 it better reflects the complexity of the task we are trying to simulate. The identification of  
390 realistic locations within the brain for each one of the model units is crucial as different  
391 locations of task-related modules will modulate different non-task nodes in the connectome,  
392 thereby producing different FC configurations.

393  
394 One of the limitations of our study is that our model connectome does not have other sensory  
395 systems apart from the visual system. Therefore, one should exercise caution when comparing  
396 FC matrices of our simulation to empirical ones as the empirical ones would contain higher FC  
397 that are the result of other sensory systems being activated by either intrinsic or extrinsic  
398 processes. For example, in an fMRI scanner room, there is significant auditory stimulation  
399 (scanner noise) as well as somatosensory input, which we have not simulated in the present  
400 work.

401  
402 In our simulations, we only embedded the visual model in the right hemisphere. As a result, the  
403 intrinsic activity was mostly localized to the right hemisphere. Nonetheless, there were  
404 significant intrinsic activity changes in the left hemisphere, and those were caused by structural  
405 connectivity between both hemispheres.

406

407 Another limitation of our study is that the weights of the structural connectome used in this  
408 paper are undirected and we assumed all connection weights to be excitatory. It is well known  
409 that diffusion tractography has serious limitations as it produces a significant number of false  
410 positives ([Maier-Hein et al., 2017](#)), has relatively low resolution and measures white tracts only  
411 indirectly ([Jbabdi, Sotiropoulos, Haber, Van Essen, & Behrens, 2015](#)). Some researchers have  
412 simulated whole brain activity using connectome datasets obtained from reconstructions of  
413 retrograde tracer injections in macaques ([Chaudhuri, Knoblauch, Gariel, Kennedy, & Wang,  
414 2015](#)) or a composite of diffusion spectrum imaging in humans and macaque tracer data ([Sanz-  
415 Leon et al., 2015](#)). Despite the low resolution and lack of sign and direction of the human  
416 tractography data, we decided to use it as it allowed the “brain regions” of our task based  
417 simulator to be embedded into plausible locations within the structural connectome.

418

## 419 **CONCLUSIONS**

420 In conclusion, we used our large-scale neural modeling framework to quantitatively compare  
421 neural dynamics of non-task brain regions during passive fixation, passive viewing, and a visual  
422 short-term memory task. We were able to obtain quantitative measures of differences in  
423 simulated functional connectivity by using graph theoretical methods. Our simulated graph  
424 theory results largely agreed with experiments. We were also able to relate those network-level  
425 changes to the underlying model mechanisms. We showed that we can use computational  
426 modeling, functional connectivity and graph theoretical metrics to quantify changes in intrinsic  
427 FC of non-task brain regions due to increasing task demands. Our work is relevant to the

428 characterization of intrinsic brain activity differences between passive and active task  
429 conditions and to the use of neural modeling in the design of empirical studies and the  
430 comparison of competing hypothesis of brain function.

431

## 432 **METHODS**

433 In the present work, we analyzed functional connectivity derived from BOLD fMRI time-series,  
434 calculated from simulated neural activity data using the framework presented in a previous  
435 paper ([Ulloa & Horwitz, 2016](#)). Whereas in our previous paper we evaluated the FC between  
436 brain regions directly involved in executing a task, in the present paper we examined the  
437 intrinsic FC in the rest of the brain (brain regions not involved in task execution). To better  
438 address that question, we performed a model parameter search to find a reasonable match  
439 between empirical and model FC. Below we briefly describe the components of the framework  
440 and how it was used to generate the simulated multi-subject experiment presented in this  
441 study. The source code of our modeling work, including simulation, analysis and visualization  
442 scripts, is freely available at [https://nidcd.github.io/lsnm\\_in\\_python/](https://nidcd.github.io/lsnm_in_python/).

443

### 444 **Visual object processing model and The Virtual Brain**

#### 445 *a. Visual object processing model*

446 Our in-house visual ([Tagamets & Horwitz, 1998](#)) object processing model consists of  
447 interconnected neuronal populations representing the cortical ventral pathway that has been  
448 shown to process primarily the features of a visual object. This stream begins in striate visual  
449 cortex, extends into the inferior temporal lobe and projects into ventrolateral prefrontal cortex

450 ([Haxby et al., 1991](#); [McIntosh et al., 1994](#); [Ungerleider & Mishkin, 1982](#)). The regions that  
451 comprise the visual model include ones representing primary and secondary visual cortex  
452 (V1/V2), area V4, anterior inferotemporal cortex (IT), and prefrontal cortex (PFC) (see Fig. 1).  
453 Each of these regions contain one or more neural populations with different functional  
454 attributes (see caption to Fig. 1 for details). This model was designed to perform a short-term  
455 memory delayed match-to-sample (DMS) task during each trial of which a stimulus S1 is  
456 presented for a certain amount of time, followed by a delay period in which S1 must be kept in  
457 short-term memory. When a second stimulus (S2) is presented, the model must respond as to  
458 whether S2 matches S1. The model can also perform control tasks: passive fixation (PF) and  
459 passive perception of the stimuli (PV), in which no response is required. Multiple trials of the  
460 active and passive tasks constitute a simulated functional neuroimaging study.

461         The key feature used to define a visual object was shape. Model neurons in V1/V2 and  
462 V4 were assumed to be orientation selective (for simplicity, horizontal and vertical orientations  
463 were used). The structural submodels employed were based on known monkey  
464 neuroanatomical data. An important assumption for the visual model, inferred from such  
465 experimental data, was that the spatial receptive field on neurons increased along the ventral  
466 processing pathway (see ([Tagamets & Horwitz, 1998](#)) for details).

467         Each neuronal population consisted of 81 microcircuits, each representing a cortical  
468 column. The model employed modified Wilson-Cowan units (an interacting excitatory and  
469 inhibitory pair of elements for which spike rate was the measure of output neural activity) as  
470 the microcircuit ([Wilson & Cowan, 1972](#)). The input synaptic activity to each neuronal unit can

471 also be evaluated and combinations of this input activity were related to the fMRI BOLD signals  
472 via a forward model.

473 In an earlier version of the model ([Horwitz et al., 2005](#)), half the neural populations  
474 within the model were 'non task-specific' neurons that served as noise generators to 'task-  
475 specific' neurons that processed shapes during the DMS task. The model generated time series  
476 of simulated electrical neuronal and synaptic activity for each module that represents a brain  
477 region. The time series of synaptic activity, convolved with a hemodynamic response function,  
478 was then used to compute simulated fMRI BOLD signal for each module representing a brain  
479 region, as well as functional connectivity among key brain regions (see ([Horwitz et al., 2005](#)) for  
480 details on this method). This model was able to perform the DMS task, generate simulated  
481 neural activities in the various brain regions that matches empirical data from non-human  
482 preparations, and produces simulated functional neuroimaging data that generally agree with  
483 human experimental findings (see ([Tagamets & Horwitz, 1998](#)) and ([Horwitz et al., 2005](#)) for  
484 details). In the current paper, we employ the version of the model introduced by Ulloa and  
485 Horwitz ([Ulloa & Horwitz, 2016](#)) in which non task-specific neurons are replaced by noise-  
486 generated activity from neural elements in The Virtual Brain software simulator ([Sanz Leon et](#)  
487 [al., 2013](#)).

488

#### 489 *b. The Virtual Brain*

490 The Virtual Brain (TVB) software ([Sanz Leon et al., 2013](#); [Sanz-Leon et al., 2015](#)) is a simulator of  
491 primarily resting state brain activity that combines: (i) white matter structural connections  
492 among brain regions to simulate long-range connections, and (ii) a given neuronal population

493 model to simulate local brain activity. It also employs forward models that convert simulated  
494 neural activity into simulated functional neuroimaging data. TVB source code and  
495 documentation are freely available from <https://github.com/the-virtual-brain>.  
496 In the current paper, for the structural model, we chose the DSI-based connectome described  
497 by ([Hagmann et al., 2008](#)), which contains 998 nodes. For the neural model for each node, we  
498 employed Wilson-Cowan population neuronal units ([Wilson & Cowan, 1972](#)) to model the local  
499 brain activity because our in-house LSNM simulators use modified Wilson-Cowan equations as  
500 their basic neuronal unit. Our forward model that converts simulated neural activity into  
501 simulated fMRI is a modification of the Balloon-Windkessel model of Friston et al. ([Friston,](#)  
502 [Mechelli, Turner, & Price, 2000](#); [Stephan, Marshall, Penny, Friston, & Fink, 2007](#)) that is  
503 included in the TVB.

504

### 505 **Integrating TVB and LSNM**

506 To perform our computational study, we concurrently ran two neural simulators: Our Large-  
507 Scale Neural Model (LSNM) simulator, which generated task-driven neural activity of the brain  
508 regions directly involved in the visual DMS task, and The Virtual Brain simulator (TVB) ([Sanz](#)  
509 [Leon et al., 2013](#)) to generate resting-state neural activity in the brain regions not involved in  
510 the task. Because the task-based brain nodes were embedded within resting-state brain ROIs,  
511 we expected that the neuroimaging activity in key connectome ROIs would differ between  
512 passive fixation (PF), passive viewing (PV), and task-based simulations. Here, we sought to



513 quantify those differences, first by comparing the pattern of functional connectivity across  
514 conditions, then by using graph theoretical methods to quantify those differences.

515         Within the LSNM, connections and parameter choices closely follow those in the original  
516 papers. Likewise, the connections and parameter choices among TVB nodes closely follow  
517 those described by Sanz-Leon et al. ([Sanz-Leon et al., 2015](#)). There are two differences between  
518 the simulations presented in this paper and the previous ([Ulloa & Horwitz, 2016](#)) paper: The  
519 location of the FR units has been changed to PreSMA and the global coupling parameter has  
520 been changed (after a parameter search procedure detailed below).

521 *a. Task-based model node placement in the TVB*

522         The connectome derived by Hagmann and colleagues ([Hagmann et al., 2008](#)) serves as a  
523 source of neural noise to our task-based neural model. Such a connectome was obtained by  
524 averaging the weighted network of five experimental subjects, where each one of the 998  
525 nodes represents a region of interest covering a surface area of approximately 1.5 cm<sup>2</sup>. The  
526 connection weights among the nodes represent cortico-cortical connections given by white  
527 matter connection density among the given nodes. As stated above, each node is represented  
528 by a Wilson-Cowan population unit and thus each node is assumed to be comprised of one  
529 excitatory and one inhibitory neural population. We implemented noise as an additive term to  
530 the stochastic Euler integration scheme provided by the TVB software.

531

532         The locations of the four PFC nodes (FS, D1, D2, FR) require some comment. The  
533 inclusion of these four neural populations in the original LSNMs was based on the

534 electrophysiological studies of Funahashi et al. ([Funahashi, Bruce, & Goldman-Rakic, 1990](#)) that  
535 found in monkey PFC four distinct neuronal responses during a delayed response task: neurons  
536 that (1) increased their activity when a stimulus was present (FS), (2) increased their activity  
537 during the delay part of the task (D1), (3) increased their activity during both when a stimulus  
538 was present and during the delay period (D2), and (4) increased their activity prior to making a  
539 correct response (FR). It is not known if these neuronal types are found in separate anatomical  
540 locations in PFC or are intermixed within the same brain area, although the latter is the more  
541 likely case (except possibly for the FR population). In the original modeling studies of Tagamets  
542 and Horwitz ([Tagamets & Horwitz, 1998](#)) and Husain et al. ([Husain, Tagamets, Fromm, Braun, &  
543 Horwitz, 2004](#)), the functional neuroimaging data represented a single region that included all  
544 four nodes. To illustrate the integrated synaptic activity and fMRI signal for each one of the  
545 modules of the combined LSNM / TVB model separately, we have assigned a different spatial  
546 location to each one of the four PFC sub-modules. We have used the Talairach coordinates of  
547 the prefrontal cortex, based on ([Haxby et al., 1991](#)), for the submodule D1 and have designated  
548 spatial locations in adjacent regions of interest for the FS and D2 submodules. The FR  
549 submodule has been allocated to a spatial location determined by an fMRI study of working  
550 memory in humans ([Pessoa et al., 2002](#)). See Table 1 for coordinate locations of each  
551 module/submodule of the visual short-term memory nodes within the structural connectome.

552 *b. Simulating electrical activity and fMRI activity*

553 Electrical activities of each node in Hagmann's connectome (TVB equations)

554 Each one of the nodes in Hagmann's connectome is represented as a Wilson-Cowan  
555 model of excitatory (E) and inhibitory (I) neuronal populations, as described in Sanz-Leon et al.  
556 ([Sanz-Leon et al., 2015](#)):

557

$$558 \quad \frac{dE_i}{dt} = \frac{1}{\tau_E} \left( -E_i + (k_E - r_E E_i) S_E \left[ \alpha_E \left( c_{EE} E_i - c_{IE} I_i - \theta_E + \Gamma(E_i, E, u_{ij}) \right) \right] \right)$$

559

560 and

561

$$562 \quad \frac{dI_i}{dt} = \frac{1}{\tau_I} \left( -I_i + (k_I - r_I I_i) S_I \left[ \alpha_I \left( c_{EI} E_i - c_{II} I_i - \theta_I + \Gamma(E_i, E, u_{ij}) \right) \right] \right)$$

563

564 where  $S_E$  and  $S_I$  are sigmoid functions described by

565

$$566 \quad S_a[f(\varphi)] = \frac{c}{1 + e^{(-a(f(\varphi_a) - b)}}$$

567

568  $c_{EE}, c_{EI}, c_{II}, c_{IE}$  are the connections within the single neuronal unit itself; note that, although  
569 the original TVB Wilson-Cowan population model allows us to consider the influence of a local  
570 neighborhood of neuronal populations, we have not used this feature in our current  
571 simulations and have left that term out of the equations above;  $\Gamma(E_k, E, u_{kj})$  is the long-range  
572 coupling function, defined as

573

574 
$$\Gamma(E_i, E, u_{ij}) = a_\Gamma \left( \sum_{j=1}^l u_{ij} E_j(t - \tau_{ij}) + \sum_{j=1}^n u_{ij} E_j(t - \tau_{ij}) \right)$$

575

576 where  $l$  is the number of nodes in the connectome and  $n$  is the number of LSNM units  
 577 connected to a connectome node;  $a_\Gamma$  is a global coupling parameter (see Supplementary Table  
 578 S1 and Table S2 for the definition and value of the parameters in the above equations).

579

580 Electrical activities of each LSNM unit

581 Each one of the submodules of the LSNM model contains 81 neuronal population units.

582 Each one of those units is modeled as a Wilson-Cowan population of excitatory ( $E$ ) and

583 inhibitory ( $I$ ) elements. The electrical activities of each one of those elements at time  $t$  is given

584 by the following equations:

585

586 
$$\frac{dE_i(t)}{dt} = \Delta \left( \frac{1}{1 + e^{-K_E[w_{EE}E_i(t) + w_{IE}I_i(t) + in_{iE}(t) - \phi_E + N(t)]}} \right) - \delta E_i(t)$$

587

588 and

589 
$$\frac{dI_i(t)}{dt} = \Delta \left( \frac{1}{1 + e^{-K_I[w_{EI}E_i(t) + in_{iI}(t) - \phi_I + N(t)]}} \right) - \delta I_i(t)$$

590

591 where  $\Delta$  is the rate of change,  $\delta$  is the rate of decay,  $K_E, K_I$  are gain constants,  $\phi_E, \phi_I$  are input

592 threshold values,  $N(t)$  is a noise term,  $w_{EE}, w_{IE}, w_{EI}$  are the weights within a unit (the values of

593  $\Delta, \delta, K, \tau, N$  are given in the Supplementary Table S3);  $in_{iE}(t), in_{iI}(t)$  are the inputs coming

594 from other brain regions at time  $t$ .  $in_{iE}(t)$  is given by:

595

$$596 \quad in_{iE}(t) = \sum_j w_{ji}^E E_j(t) + \sum_j w_{ji}^I I_j(t) + \sum_j c_{ji} z_{ji}^C C_j(t)$$

597

598 where  $w_{ji}^E$  and  $w_{ji}^I$  are the weights originating from excitatory (E) or inhibitory (I) unit  $j$  from  
599 another LSNM unit into the  $i$ th excitatory element,  $C_j$  is the connectome excitatory unit  $j$  with  
600 connections to the LSNM unit  $i$ ,  $z_{ji}^C$  is the value of the anatomical connection weight from  
601 connectome unit  $j$  to LSNM unit  $i$ , and  $c_{ji}$  is a coupling term, which was obtained by using  
602 Python's Gaussian pseudo-random number generator (*random.gauss*), using  $a_T/81$  as the  
603 mean value. The input coming into the  $i$ th inhibitory element,  $in_{iI}(t)$ , is given by:

604

$$605 \quad in_{iI}(t) = \sum_k w_{ki}^E E_k(t) + \sum_k w_{ki}^I I_k(t)$$

606 where  $w_{ki}^E$  and  $w_{ki}^I$  are the weights originating from excitatory (E) or inhibitory (I) unit  $k$  from  
607 another LSNM unit into the  $i$ th inhibitory element. Note that there are no connections from the  
608 connectome to LSNM inhibitory units. See Supplementary Tables S4 and S5 for details. Note  
609 also that, whereas TVB simulator incorporates transmission delay among the connectome  
610 nodes, the LSNM nodes do not.

### 611 Integrated synaptic activity

612 Prior to computing fMRI BOLD activities we compute the synaptic activity, spatially  
613 integrated over each LSNM module (or connectome node) and temporally integrated over 50  
614 milliseconds as described by ([Horwitz & Tagamets, 1999](#))

615

616

$$rSYN = \sum_{t,i} IN_i(t)$$

617

618 where  $IN_i(t)$  is the sum of absolute values of all inputs to both  $E$  and  $I$  elements of unit  $i$ , at

619 time  $t$ , and is given by:

620

621

$$IN_i(t) = w_{EE}E_i(t) + w_{EI}E_i(t) + |w_{IE}I_i(t)| + \sum_{k,i} w_{ki}E_k(t)$$

622

623 Note that the first three terms above are the synaptic weights from within unit  $i$  and the last

624 term is the sum of synaptic connections originating in all other LSNM units and connectome

625 nodes connected to unit  $i$ . Note also that, in our current scheme, there are no long-range

626 connections from inhibitory populations.

627

628 Generation of subjects and task performance of the LSNM model

629 We generated simulated subjects by creating several different sets of connection

630 weights among submodules of the LSNM visual network until we obtained the number of

631 desired subjects whose task performance was above 60 percent. However, the weights among

632 the nodes with the TVB connectome remained unchanged across subjects. The generation of

633 different connectome sets to simulate individual subjects is outside the scope of the current

634 paper but will be essential for future simulation studies investigating the effects of a behavioral

635 task on non-task brain nodes. Task performance was measured as the proportion of correct

636 responses over an experiment. A response in the response module (FR, described in the caption  
637 to Fig. 1) was considered a correct response in each trial if at least 2 units had neuronal  
638 electrical responses above a threshold of 0.7 during the response period. To create different  
639 sets of weights that were different from the ideal subject, we multiplied feedforward  
640 connections among modules in the LSNM visual model by a random proportion of between  
641 0.95 and 1.

642

#### 643 Equations for the forward fMRI BOLD model

644 We implemented the BOLD signal model described by ([Stephan et al., 2007](#)). We use the  
645 output of the integrated synaptic activity above as the neural state equation to the  
646 hemodynamic state equations below. The BOLD signal for each region of interest,  $y(t)$ , is  
647 computed as follows:

648

$$649 \quad y(t) = V_0 \left( k_1(1 - q(t)) + k_2 \left( 1 - \frac{q(t)}{v(t)} \right) + k_3(1 - v(t)) \right).$$

650

651 where the coefficients  $k_1, k_2, k_3$  are computed as:

652

$$653 \quad k_1 = 4.3\theta_0 E_0 TE$$

$$654 \quad k_2 = \varepsilon r_0 E_0 TE$$

$$655 \quad k_3 = 1 - \varepsilon$$

656

657 where  $V_0$  is the resting venous blood volume fraction,  $q$  is the deoxyhemoglobin content,  $v$  is  
658 the venous blood volume,  $E_0$  is the oxygen extraction fraction at rest,  $\varepsilon$  is the ratio of intra- and  
659 extravascular signals, and  $r_0$  is the slope of the relation between the intravascular relaxation  
660 rate and oxygen saturation,  $\vartheta_0$  is the frequency offset at the outer surface of the magnetized  
661 vessel for fully deoxygenated blood at 3T, and TE is the echo time. The evolution of the venous  
662 blood volume  $v$  and deoxyhemoglobin content  $q$  is given by the balloon model hemodynamic  
663 state equations, as follows:

664

$$665 \quad \tau_0 \frac{dv}{dt} = f(t) - v(t)^{1/\alpha}$$

$$666 \quad \tau_0 \frac{dq}{dt} = f(t) \frac{1 - (1 - E_0)^{1/f}}{E_0} - v(t)^{1/\alpha} \frac{q(t)}{v(t)}$$

667

668 where  $\tau_0$  is the hemodynamics transit time,  $\alpha$  represents the resistance of the venous balloon  
669 (vessel stiffness), and  $f(t)$  is the blood inflow at time  $t$  and is given by

670

$$671 \quad \frac{df}{dt} = s$$

672

673 where  $s$  is an exponentially decaying, vasodilatory signal given by

674

$$675 \quad \frac{ds}{dt} = \varepsilon x(t) - \frac{s(t)}{\tau_s} - \frac{(f(t) - 1)}{\tau_f}$$

676



677 where  $\epsilon$  is the efficacy with which neuronal activity  $x(t)$  (i.e., integrated synaptic activity) causes  
678 an increase in signal,  $\tau_s$  is the time constant for signal decay, and  $\tau_f$  is the time constant for  
679 autoregulatory feedback from blood flow ([Friston et al., 2000](#)). See Supplementary Table S6 for  
680 the values of the above parameters. The simulated fMRI BOLD time series resulting from the  
681 above equations were low-pass filtered ( $<0.25\text{Hz}$ ) and down-sampled every two seconds.

682

### 683 **Resting State parameter exploration**

684 We performed a global parameter exploration (for which we used exclusively the TVB simulator  
685 and the structural connectome with no task nodes) to obtain a reasonable match between  
686 empirical and model FC ([Cabral et al., 2011](#)). We obtained the empirical functional connectivity  
687 datasets from ([Hagmann et al., 2008](#)) which we used as a target for our simulated FC. Note that  
688 we used a low resolution (66 nodes) FC of matrices to perform the comparisons between  
689 empirical and resting state simulations ([Honey et al., 2009](#)): We transformed all correlation  
690 coefficients to Fisher's Z values and averaged the FC matrices across subjects within each  
691 condition. We then calculated low-resolution (66 ROIs) matrices (each ROI corresponding to a  
692 brain region in the Desikan-Killiany parcellation ([Desikan et al., 2006](#)) for each condition  
693 ([Hagmann et al., 2008](#); [Honey et al., 2009](#)) by averaging FC coefficients within each one of the  
694 low-resolution ROIs ([Hagmann et al., 2008](#)) and converted back to correlation coefficients using  
695 an inverse Fisher's Z transformation. We systematically varied the global coupling parameter  
696 ( $\alpha_T$  in the long-range coupling equation above) and the white matter conduction speed and  
697 conducted a 198-second resting state simulation for each parameter combination. We  
698 calculated a Pearson correlation coefficient between the model FC matrix (for each parameter

699 combination) and the empirical FC matrix. Then, we chose the parameter combination that  
700 gave us the highest correlation value and used that combination for the PF, PV and DMS  
701 simulations of our study. The global strength parameter range used was between 0.0042 and  
702 0.15 with a step of 0.01. The conduction speed parameter range used was between 1 and 10  
703 m/s with a step of 1. The best combination of parameters was (0.15, 3) which yielded a  
704 correlation value between simulated and empirical FC of  $r=0.37$ . Note that absent structural  
705 connections were removed from this correlation calculation as in ([Honey et al., 2009](#)), but not  
706 in the rest of the paper.

707

#### 708 **From RS to PF, PV, and DMS**

709 After finding an optimal match between empirical and simulated RS, we performed a simulation  
710 of RS with stimulation in visual task nodes using only the TVB simulator ([Sanz-Leon et al., 2015](#)).  
711 The correlation between RS FC and RS with stimulation FC was 0.90. Subsequently, we used a  
712 blend of our LSNM simulator and TVB to simulated PF. The correlation between RS with  
713 stimulation and PF was 0.9. As a last step, we performed a DMS simulation and compared it to  
714 the PF simulation (correlation was 0.79). Thus, we used a TVB RS simulation (matched to  
715 empirical RS) as a starting point for our PF and task-based simulations.

716

#### 717 **Network construction**

718 The simulations were performed using the TVB simulator with the 998-node Hagmann  
719 connectome and the LSNM visual short-term memory simulator described above. We isolated  
720 the synaptic activity timeseries of connectome nodes from the task nodes' synaptic activity. We

721 used the Balloon model to estimate fMRI BOLD activation over each one of the 998 nodes, for  
722 each condition, and for each subject separately. We calculated zero lag Pearson correlation  
723 coefficients for each pair of the BOLD timeseries to obtain a FC matrix for each condition and  
724 for each subject. We used the weighted FC matrices within each condition to construct graphs  
725 where each one of the 998 ROIs corresponded to a graph node and the correlation coefficients  
726 between each pair of ROIs corresponded to graph edges ([Bolt, Nomi, et al., 2017](#); [Di et al.,  
727 2013](#)). To keep the same number of edges across conditions, we thresholded the network  
728 edges to a sparsity level of between 5% and 40% ([Di et al., 2013](#)) with a step size of 5%.

729

### 730 **Graph theory analysis**

731 A set of eight graph theoretical metrics (global efficiency, local efficiency, clustering coefficient,  
732 characteristic path length, eigenvector centrality, betweenness centrality, participation  
733 coefficient, and modularity) were calculated using the FC matrices for each of the conditions  
734 using the Brain Connectivity Toolbox ([Rubinov & Sporns, 2010](#)) in Python, publicly available at  
735 <https://github.com/aestrivex/bctpy>. We calculated graph metrics for each individual FC matrix,  
736 for each condition and for each density threshold. Then we calculated the average and standard  
737 deviation of each graph metric for each density threshold.

738 *Global efficiency* ([Latora & Marchiori, 2001](#)) measures “functional integration” ([Rubinov &  
739 Sporns, 2010](#)) and indicates how well nodes are coupled through functional connections across  
740 the entire brain. Global efficiency is calculated as the average inverse shortest path length  
741 ([Rubinov & Sporns, 2010](#)). *Local efficiency* is the inverse of the average shortest path  
742 connecting a given node to its neighbors ([Lee et al., 2017](#)). *Clustering coefficient* ([Watts &](#)

743 [Strogatz, 1998](#)) is a measure of “functional segregation” ([Rubinov & Sporns, 2010](#)). The  
744 clustering coefficient of a network node is the proportion of the given node’s neighbors that are  
745 functionally connected to each other. Whole brain clustering coefficient is calculated as the  
746 average of the clustering coefficients in a functional connectivity matrix ([Rubinov & Sporns,](#)  
747 [2010](#)). *Characteristic path length* is the average shortest path length between all node pairs in a  
748 network ([Rubinov & Sporns, 2010](#)). *Eigenvector centrality* is a measure of centrality that  
749 considers degree of a given node and degree of that node’s neighbors ([Fornito, Zalesky, &](#)  
750 [Bullmore, 2016 2016](#)). Betweenness centrality is the fraction of shortest paths that cross a given  
751 network node ([Rubinov & Sporns, 2010](#)). *Participation coefficient* is a measure of each node’s  
752 participation in a given set of network communities. We used a set of six network communities  
753 for the participation coefficient calculation, as shown in Table S1 of ([Hagmann et al., 2008](#)),  
754 Table S1. *Modularity* ([Newman, 2004](#)) is a metric of functional segregation and it detects  
755 community structure in a network by dividing a functional connectivity matrix into sets of non-  
756 overlapping modules and it measures how well a network can be divided into those modules  
757 ([Rubinov & Sporns, 2010](#)).

758

## 759 **SUPPORTING INFORMATION**

760 Table S1. Parameters used in the Wilson-Cowan equation for each connectome within TVB.

761 Table S2. Parameters used for simulating the Hagmann connectome within the TVB simulator.

762 Table S3. Parameters used in the Wilson-Cowan unit model of each LSNM submodule.

763 Table S4. Connection patterns among submodules of the LSNM model.

764 Table S5. Connection weights among submodules in the prefrontal cortex regions of LSNM.

765 Table S6. Parameters used for the Balloon model of hemodynamic response.

766

## 767 **ACKNOWLEDGEMENTS**

768 This research was funded by the Division of Intramural Research of the National Institute on  
769 Deafness and Other Communication Disorders. We thank Olaf Sporns and Chris Honey for  
770 sharing the functional and structural connectivity data sets from their empirical studies used in  
771 the present paper. We thank Paul Corbitt for useful discussions related to the simulation code  
772 used for our analysis and the parameters used for converting synaptic activity to fMRI BOLD  
773 time-series. We thank Marmaduke Woodman for helping us navigate technical aspects of the  
774 TVB simulator.

775

## 776 **REFERENCES**

777 Adams, R. A., Shipp, S., & Friston, K. J. (2013). Predictions not commands: active inference in  
778 the motor system. *Brain Struct Funct*, *218*(3), 611-643. doi:10.1007/s00429-012-0475-5  
779 Bastian, M., Heymann, S., & Jacomy, M. (2009). Gephi: an open source software for exploring  
780 and manipulating networks. *International AAAI conference on weblogs and social media*,  
781 361-362.  
782 Benjamin, C., Lieberman, D. A., Chang, M., Ofen, N., Whitfield-Gabrieli, S., Gabrieli, J. D., &  
783 Gaab, N. (2010). The influence of rest period instructions on the default mode network.  
784 *Front Hum Neurosci*, *4*, 218. doi:10.3389/fnhum.2010.00218

- 785 Biswal, B., Yetkin, F. Z., Haughton, V. M., & Hyde, J. S. (1995). Functional connectivity in the  
786 motor cortex of resting human brain using echo-planar MRI. *Magn Reson Med*, 34(4),  
787 537-541.
- 788 Blondel, V. D., Guillaume, J.-L., Lambiotte, R., & Lefebvre, E. (2008). Fast unfolding of  
789 communities in large networks. *J. Stat. Mech.*(2008), P10008. doi:DOI: 10.1088/1742-  
790 5468/2008/10/P10008
- 791 Bluhm, R. L., Clark, C. R., McFarlane, A. C., Moores, K. A., Shaw, M. E., & Lanius, R. A. (2011).  
792 Default network connectivity during a working memory task. *Hum Brain Mapp*, 32(7),  
793 1029-1035. doi:10.1002/hbm.21090
- 794 Bolt, T., Anderson, M. L., & Uddin, L. Q. (2017). Beyond the evoked/intrinsic neural process  
795 dichotomy. *Network Neuroscience*, 0(0), 1-22. doi:10.1162/NETN\_a\_00028
- 796 Bolt, T., Nomi, J. S., Rubinov, M., & Uddin, L. Q. (2017). Correspondence between evoked and  
797 intrinsic functional brain network configurations. *Hum Brain Mapp*.  
798 doi:10.1002/hbm.23500
- 799 Branco, P., Seixas, D., Deprez, S., Kovacs, S., Peeters, R., Castro, S. L., & Sunaert, S. (2016).  
800 Resting-State Functional Magnetic Resonance Imaging for Language Preoperative  
801 Planning. *Front Hum Neurosci*, 10, 11. doi:10.3389/fnhum.2016.00011
- 802 Buckner, R. L., Sepulcre, J., Talukdar, T., Krienen, F. M., Liu, H., Hedden, T., . . . Johnson, K. A.  
803 (2009). Cortical hubs revealed by intrinsic functional connectivity: mapping, assessment  
804 of stability, and relation to Alzheimer's disease. *J Neurosci*, 29(6), 1860-1873.  
805 doi:10.1523/JNEUROSCI.5062-08.2009

- 806 Cabral, J., Hugues, E., Sporns, O., & Deco, G. (2011). Role of local network oscillations in resting-  
807 state functional connectivity. [Yes-HL]. *Neuroimage*, 57(1), 130-139. doi:S1053-  
808 8119(11)00388-0 [pii]  
809 10.1016/j.neuroimage.2011.04.010
- 810 Chaudhuri, R., Knoblauch, K., Gariel, M. A., Kennedy, H., & Wang, X. J. (2015). A Large-Scale  
811 Circuit Mechanism for Hierarchical Dynamical Processing in the Primate Cortex. *Neuron*,  
812 88(2), 419-431. doi:10.1016/j.neuron.2015.09.008
- 813 Cohen, J. R., & D'Esposito, M. (2016). The Segregation and Integration of Distinct Brain  
814 Networks and Their Relationship to Cognition. *J Neurosci*, 36(48), 12083-12094.  
815 doi:10.1523/JNEUROSCI.2965-15.2016
- 816 Cole, M. W., Bassett, D. S., Power, J. D., Braver, T. S., & Petersen, S. E. (2014). Intrinsic and task-  
817 evoked network architectures of the human brain. *Neuron*, 83(1), 238-251.  
818 doi:10.1016/j.neuron.2014.05.014
- 819 Cole, M. W., Ito, T., Bassett, D. S., & Schultz, D. H. (2016). Activity flow over resting-state  
820 networks shapes cognitive task activations. *Nat Neurosci*, 19(12), 1718-1726.  
821 doi:10.1038/nn.4406
- 822 DeSalvo, M. N., Douw, L., Takaya, S., Liu, H., & Stufflebeam, S. M. (2014). Task-dependent  
823 reorganization of functional connectivity networks during visual semantic decision  
824 making. *Brain Behav*, 4(6), 877-885. doi:10.1002/brb3.286
- 825 Desikan, R. S., Segonne, F., Fischl, B., Quinn, B. T., Dickerson, B. C., Blacker, D., . . . Killiany, R. J.  
826 (2006). An automated labeling system for subdividing the human cerebral cortex on MRI

- 827 scans into gyral based regions of interest. *Neuroimage*, 31(3), 968-980.
- 828 doi:10.1016/j.neuroimage.2006.01.021
- 829 Di, X., Gohel, S., Kim, E. H., & Biswal, B. B. (2013). Task vs. rest-different network configurations
- 830 between the coactivation and the resting-state brain networks. *Front Hum Neurosci*, 7,
- 831 493. doi:10.3389/fnhum.2013.00493
- 832 Fornito, A., Zalesky, A., & Bullmore, E. T. (2016). *Fundamental of brain network analysis*.
- 833 Amsterdam ; Boston: Elsevier/Academic Press.
- 834 Fox, M. D., Corbetta, M., Snyder, A. Z., Vincent, J. L., & Raichle, M. E. (2006). Spontaneous
- 835 neuronal activity distinguishes human dorsal and ventral attention systems. *Proc Natl*
- 836 *Acad Sci U S A*, 103(26), 10046-10051. doi:10.1073/pnas.0604187103
- 837 Friston, K. J., Mechelli, A., Turner, R., & Price, C. J. (2000). Nonlinear responses in fMRI: the
- 838 Balloon model, Volterra kernels, and other hemodynamics. *Neuroimage*, 12(4), 466-477.
- 839 doi:10.1006/nimg.2000.0630
- 840 Fuertinger, S., Horwitz, B., & Simonyan, K. (2015). The Functional Connectome of Speech
- 841 Control. *PLoS Biol*, 13(7), e1002209. doi:10.1371/journal.pbio.1002209
- 842 Funahashi, S., Bruce, C. J., & Goldman-Rakic, P. S. (1990). Visuospatial coding in primate
- 843 prefrontal neurons revealed by oculomotor paradigms. *J Neurophysiol*, 63(4), 814-831.
- 844 doi:10.1152/jn.1990.63.4.814
- 845 Ghosh, A., Rho, Y., McIntosh, A. R., Kotter, R., & Jirsa, V. K. (2008). Noise during rest enables the
- 846 exploration of the brain's dynamic repertoire. *PLoS Comput Biol*, 4(10), e1000196.
- 847 doi:10.1371/journal.pcbi.1000196



- 848 Gilson, M., Moreno-Bote, R., Ponce-Alvarez, A., Ritter, P., & Deco, G. (2016). Estimation of  
849 Directed Effective Connectivity from fMRI Functional Connectivity Hints at Asymmetries  
850 of Cortical Connectome. *PLoS Comput Biol*, *12*(3), e1004762.  
851 doi:10.1371/journal.pcbi.1004762
- 852 Greicius, M. D., Krasnow, B., Reiss, A. L., & Menon, V. (2003). Functional connectivity in the  
853 resting brain: a network analysis of the default mode hypothesis. *Proc Natl Acad Sci U S*  
854 *A*, *100*(1), 253-258. doi:10.1073/pnas.0135058100
- 855 Hagmann, P., Cammoun, L., Gigandet, X., Meuli, R., Honey, C. J., Wedeen, V. J., & Sporns, O.  
856 (2008). Mapping the structural core of human cerebral cortex. *PLoS Biol*, *6*(7), e159.  
857 doi:10.1371/journal.pbio.0060159
- 858 Hansen, E. C., Battaglia, D., Spiegler, A., Deco, G., & Jirsa, V. K. (2015). Functional connectivity  
859 dynamics: modeling the switching behavior of the resting state. *Neuroimage*, *105*, 525-  
860 535. doi:10.1016/j.neuroimage.2014.11.001
- 861 Havlicek, M., Roebroek, A., Friston, K., Gardumi, A., Ivanov, D., & Uludag, K. (2015).  
862 Physiologically informed dynamic causal modeling of fMRI data. *Neuroimage*, *122*, 355-  
863 372. doi:10.1016/j.neuroimage.2015.07.078
- 864 Haxby, J. V., Grady, C. L., Horwitz, B., Ungerleider, L. G., Mishkin, M., Carson, R. E., . . . Rapoport,  
865 S. I. (1991). Dissociation of object and spatial visual processing pathways in human  
866 extrastriate cortex. *Proc. Natl. Acad. Sci. USA*, *88*, 1621-1625.
- 867 Haxby, J. V., Ungerleider, L. G., Horwitz, B., Rapoport, S. I., & Grady, C. L. (1995). Hemispheric  
868 differences in neural systems for face working memory: A PET-rCBF study. *Human Brain*  
869 *Mapp.*, *3*(2), 68-82. doi:DOI 10.1002/hbm.460030204

- 870 Heinzle, J., Koopmans, P. J., den Ouden, H. E., Raman, S., & Stephan, K. E. (2016). A  
871 hemodynamic model for layered BOLD signals. *Neuroimage*, *125*, 556-570.  
872 doi:10.1016/j.neuroimage.2015.10.025
- 873 Honey, C. J., Sporns, O., Cammoun, L., Gigandet, X., Thiran, J. P., Meuli, R., & Hagmann, P.  
874 (2009). Predicting human resting-state functional connectivity from structural  
875 connectivity. *Proc Natl Acad Sci U S A*, *106*(6), 2035-2040. doi:10.1073/pnas.0811168106
- 876 Horwitz, B., & Tagamets, M.-A. (1999). Predicting human functional maps with neural net  
877 modeling. *Human Brain Mapp.*, *8*, 137-142.
- 878 Horwitz, B., Warner, B., Fitzer, J., Tagamets, M. A., Husain, F. T., & Long, T. W. (2005).  
879 Investigating the neural basis for functional and effective connectivity. Application to  
880 fMRI. *Philos Trans R Soc Lond B Biol Sci*, *360*(1457), 1093-1108.  
881 doi:10.1098/rstb.2005.1647
- 882 Husain, F. T., Tagamets, M. A., Fromm, S. J., Braun, A. R., & Horwitz, B. (2004). Relating neuronal  
883 dynamics for auditory object processing to neuroimaging activity: a computational  
884 modeling and an fMRI study. *Neuroimage*, *21*(4), 1701-1720.  
885 doi:10.1016/j.neuroimage.2003.11.012
- 886 Jbabdi, S., Sotiropoulos, S. N., Haber, S. N., Van Essen, D. C., & Behrens, T. E. (2015). Measuring  
887 macroscopic brain connections in vivo. *Nat Neurosci*, *18*(11), 1546-1555.  
888 doi:10.1038/nn.4134
- 889 Krienen, F. M., Yeo, B. T., & Buckner, R. L. (2014). Reconfigurable task-dependent functional  
890 coupling modes cluster around a core functional architecture. *Philos Trans R Soc Lond B*  
891 *Biol Sci*, *369*(1653). doi:10.1098/rstb.2013.0526

- 892 Latora, V., & Marchiori, M. (2001). Efficient behavior of small-world networks. *Phys Rev Lett*,  
893 87(19), 198701. doi:10.1103/PhysRevLett.87.198701
- 894 Lee, W. H., Bullmore, E., & Frangou, S. (2017). Quantitative evaluation of simulated functional  
895 brain networks in graph theoretical analysis. *Neuroimage*, 146, 724-733.  
896 doi:10.1016/j.neuroimage.2016.08.050
- 897 Liu, H., Buckner, R. L., Talukdar, T., Tanaka, N., Madsen, J. R., & Stufflebeam, S. M. (2009). Task-  
898 free presurgical mapping using functional magnetic resonance imaging intrinsic activity.  
899 *J Neurosurg*, 111(4), 746-754. doi:10.3171/2008.10.JNS08846
- 900 Maier-Hein, K. H., Neher, P. F., Houde, J. C., Cote, M. A., Garyfallidis, E., Zhong, J., . . .  
901 Descoteaux, M. (2017). The challenge of mapping the human connectome based on  
902 diffusion tractography. *Nat Commun*, 8(1), 1349. doi:10.1038/s41467-017-01285-x
- 903 McIntosh, A. R., Grady, C. L., Ungerleider, L. G., Haxby, J. V., Rapoport, S. I., & Horwitz, B.  
904 (1994). Network analysis of cortical visual pathways mapped with PET. *J. Neurosci.*, 14,  
905 655-666.
- 906 Meunier, D., Fonlupt, P., Saive, A. L., Plailly, J., Ravel, N., & Royet, J. P. (2014). Modular structure  
907 of functional networks in olfactory memory. *Neuroimage*, 95, 264-275.  
908 doi:10.1016/j.neuroimage.2014.03.041
- 909 Moussa, M. N., Vechlekar, C. D., Burdette, J. H., Steen, M. R., Hugenschmidt, C. E., & Laurienti,  
910 P. J. (2011). Changes in cognitive state alter human functional brain networks. *Front*  
911 *Hum Neurosci*, 5, 83. doi:10.3389/fnhum.2011.00083
- 912 Newman, M. E. (2004). Fast algorithm for detecting community structure in networks. *Phys Rev*  
913 *E Stat Nonlin Soft Matter Phys*, 69(6 Pt 2), 066133. doi:10.1103/PhysRevE.69.066133

- 914 Obata, T., Liu, T. T., Miller, K. L., Luh, W.-M., Wong, E. C., Frank, L. R., & Buxton, R. B. (2004).  
915 Discrepancies between BOLD and flow dynamics in primary and supplementary motor  
916 areas: application of the balloon model to the interpretation of BOLD transients.  
917 *Neuroimage*, 21(1), 144-153. doi:10.1016/j.neuroimage.2003.08.040
- 918 Pessoa, L., Gutierrez, E., Bandettini, P., & Ungerleider, L. (2002). Neural correlates of visual  
919 working memory: fMRI amplitude predicts task performance. *Neuron*, 35(5), 975-987.
- 920 Petit, L., Courtney, S. M., Ungerleider, L. G., & Haxby, J. V. (1998). Sustained activity in the  
921 medial wall during working memory delays. *J Neurosci*, 18(22), 9429-9437.
- 922 Ponce-Alvarez, A., He, B. J., Hagmann, P., & Deco, G. (2015). Task-Driven Activity Reduces the  
923 Cortical Activity Space of the Brain: Experiment and Whole-Brain Modeling. [Yes-HL].  
924 *PLoS Comput Biol*, 11(8), e1004445. doi:10.1371/journal.pcbi.1004445
- 925 Roy, D., Sigala, R., Breakspear, M., McIntosh, A. R., Jirsa, V. K., Deco, G., & Ritter, P. (2014).  
926 Using the virtual brain to reveal the role of oscillations and plasticity in shaping brain's  
927 dynamical landscape. *Brain Connect*, 4(10), 791-811. doi:10.1089/brain.2014.0252
- 928 Rubinov, M., & Sporns, O. (2010). Complex network measures of brain connectivity: uses and  
929 interpretations. *Neuroimage*, 52(3), 1059-1069. doi:10.1016/j.neuroimage.2009.10.003
- 930 Sanz Leon, P., Knock, S. A., Woodman, M. M., Domide, L., Mersmann, J., McIntosh, A. R., & Jirsa,  
931 V. (2013). The Virtual Brain: a simulator of primate brain network dynamics. [Yes-HL].  
932 *Front Neuroinform*, 7, 10. doi:10.3389/fninf.2013.00010
- 933 Sanz-Leon, P., Knock, S. A., Spiegler, A., & Jirsa, V. K. (2015). Mathematical framework for large-  
934 scale brain network modeling in The Virtual Brain. *Neuroimage*, 111, 385-430.  
935 doi:10.1016/j.neuroimage.2015.01.002

- 936 Smith, S. M., Fox, P. T., Miller, K. L., Glahn, D. C., Fox, P. M., Mackay, C. E., . . . Beckmann, C. F.  
937 (2009). Correspondence of the brain's functional architecture during activation and rest.  
938 *Proc Natl Acad Sci U S A*, *106*(31), 13040-13045. doi:10.1073/pnas.0905267106
- 939 Stephan, K. E., Marshall, J. C., Penny, W. D., Friston, K. J., & Fink, G. R. (2007). Interhemispheric  
940 integration of visual processing during task-driven lateralization. *J Neurosci*, *27*(13),  
941 3512-3522. doi:10.1523/JNEUROSCI.4766-06.2007
- 942 Stevens, A. A., Tappon, S. C., Garg, A., & Fair, D. A. (2012). Functional brain network modularity  
943 captures inter- and intra-individual variation in working memory capacity. *PLoS One*,  
944 *7*(1), e30468. doi:10.1371/journal.pone.0030468
- 945 Tagamets, M.-A., & Horwitz, B. (1998). Integrating electrophysiological and anatomical  
946 experimental data to create a large-scale model that simulates a delayed match-to-  
947 sample human brain imaging study. *Cereb. Cortex*, *8*, 310-320.
- 948 Tomasi, D., Wang, R., Wang, G. J., & Volkow, N. D. (2014). Functional connectivity and brain  
949 activation: a synergistic approach. *Cereb Cortex*, *24*(10), 2619-2629.  
950 doi:10.1093/cercor/bht119
- 951 Tommasin, S., Mascali, D., Gili, T., Assan, I. E., Moraschi, M., Fratini, M., . . . Giove, F. (2017).  
952 Task-Related Modulations of BOLD Low-Frequency Fluctuations within the Default  
953 Mode Network. *Front Phys*, *5*. doi:10.3389/fphy.2017.00031
- 954 Ulloa, A., & Horwitz, B. (2016). Embedding Task-Based Neural Models into a Connectome-Based  
955 Model of the Cerebral Cortex. *Front Neuroinform*, *10*, 32. doi:10.3389/fninf.2016.00032

- 956 Ungerleider, L. G., & Mishkin, M. (1982). Two cortical visual systems. In D. J. Ingle, M. A.  
957 Goodale, & R. J. W. Mansfield (Eds.), *Analysis of Visual Behavior* (pp. 549-586).  
958 Cambridge: MIT Press.
- 959 Van Dijk, K. R., Hedden, T., Venkataraman, A., Evans, K. C., Lazar, S. W., & Buckner, R. L. (2010).  
960 Intrinsic functional connectivity as a tool for human connectomics: theory, properties,  
961 and optimization. *J Neurophysiol*, *103*(1), 297-321. doi:10.1152/jn.00783.2009
- 962 Vatansever, D., Menon, D. K., Manktelow, A. E., Sahakian, B. J., & Stamatakis, E. A. (2015).  
963 Default mode network connectivity during task execution. *Neuroimage*, *122*, 96-104.  
964 doi:10.1016/j.neuroimage.2015.07.053
- 965 Waites, A. B., Stanislavsky, A., Abbott, D. F., & Jackson, G. D. (2005). Effect of prior cognitive  
966 state on resting state networks measured with functional connectivity. *Hum Brain*  
967 *Mapp*, *24*(1), 59-68. doi:10.1002/hbm.20069
- 968 Watts, D. J., & Strogatz, S. H. (1998). Collective dynamics of 'small-world' networks. *Nature*,  
969 *393*(6684), 440-442. doi:10.1038/30918
- 970 Wen, X., Zhang, D., Liang, B., Zhang, R., Wang, Z., Wang, J., . . . Huang, R. (2015).  
971 Reconfiguration of the Brain Functional Network Associated with Visual Task Demands.  
972 *PLoS One*, *10*(7), e0132518. doi:10.1371/journal.pone.0132518
- 973 Wilson, H. R., & Cowan, J. D. (1972). Excitatory and inhibitory interactions in localized  
974 populations of model neurons. *Biophys. J.*, *12*, 1-24.
- 975 Yan, C., Liu, D., He, Y., Zou, Q., Zhu, C., Zuo, X., . . . Zang, Y. (2009). Spontaneous brain activity in  
976 the default mode network is sensitive to different resting-state conditions with limited  
977 cognitive load. *PLoS One*, *4*(5), e5743. doi:10.1371/journal.pone.0005743

978 Yeo, B. T., Krienen, F. M., Sepulcre, J., Sabuncu, M. R., Lashkari, D., Hollinshead, M., . . . Buckner,  
979 R. L. (2011). The organization of the human cerebral cortex estimated by intrinsic  
980 functional connectivity. *J Neurophysiol*, *106*(3), 1125-1165. doi:10.1152/jn.00338.2011  
981 Yue, Q., Martin, R. C., Fischer-Baum, S., Ramos-Nunez, A. I., Ye, F., & Deem, M. W. (2017). Brain  
982 Modularity Mediates the Relation between Task Complexity and Performance. *J Cogn*  
983 *Neurosci*, *29*(9), 1532-1546. doi:10.1162/jocn\_a\_01142  
984  
985

986 **Table 1.** Hypothesized locations, in Talairach coordinates, of visual LSMN modules, along with  
987 the closest node in the Hagmann et al. connectome. Note that the locations of FS and D2 are  
988 not explicitly known (see text) and were chosen only to demonstrate validity of the method.  
989

| Visual submodule | Talairach location                          | Source                                                                       | Host connectome node |
|------------------|---------------------------------------------|------------------------------------------------------------------------------|----------------------|
| V1/V2            | (18, -88, 8)                                | ( <a href="#">Haxby, Ungerleider, Horwitz, Rapoport, &amp; Grady, 1995</a> ) | (14, -86, 7)         |
| V4               | (30, -72, -12)                              | ( <a href="#">Haxby et al., 1995</a> )                                       | (33, -70, -7)        |
| IT               | (28, -36, -8)                               | ( <a href="#">Haxby et al., 1995</a> )                                       | (31, -39, -6)        |
| FS               | Location selected for illustrative purposes |                                                                              | (47, 19, 9)          |
| D1               | (42, 26, 20)                                | ( <a href="#">Haxby et al., 1995</a> )                                       | (43, 29, 21)         |
| D2               | Location selected for illustrative purposes |                                                                              | (42, 39, 2)          |
| FR               | (1, 7, 48)                                  | ( <a href="#">Pessoa et al., 2002</a> )                                      | (8, 6, 50)           |

990  
991



992

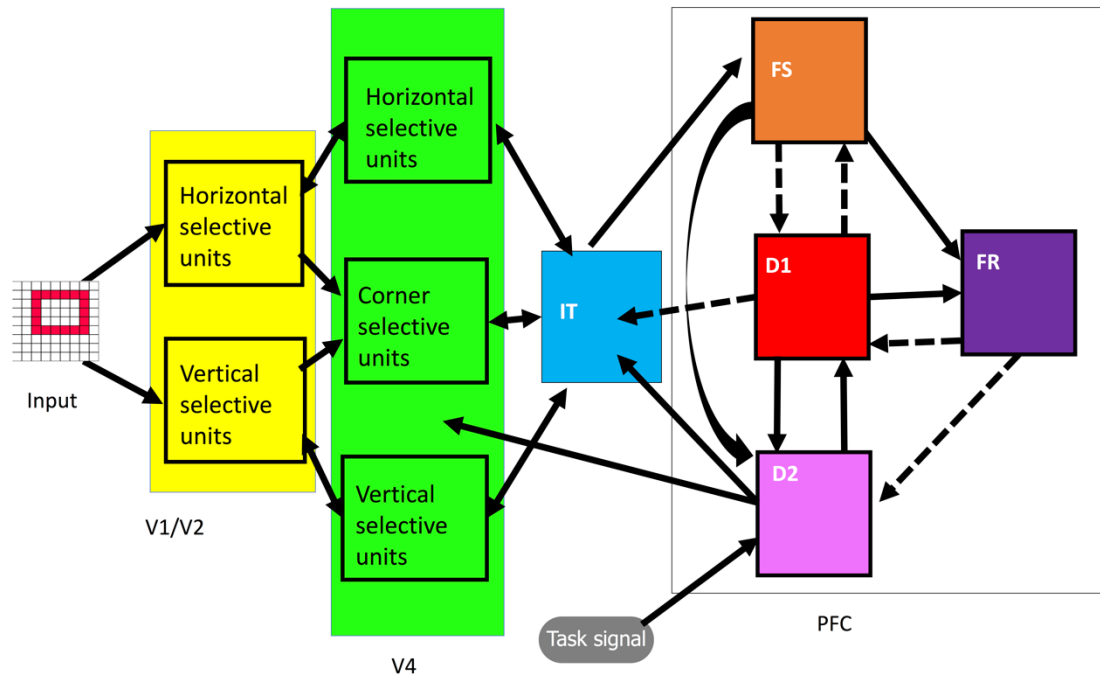

993

994 **Figure 1.** Visual short-term memory model consisted of interconnected neural populations that

995 represent primary and secondary visual (V1/V2, V4), inferotemporal (IT), and prefrontal cortex

996 (PFC). Each one of the sub-modules (shown above as squares) within a given brain module is

997 modeled with 81 (9x9) modified Wilson-Cowan neuronal population units. Solid arrows

998 represent Excitatory to Excitatory connections and dashed arrows represent Excitatory to

999 Inhibitory connections. Adapted from ([Horwitz et al., 2005](#)).

1000

1001

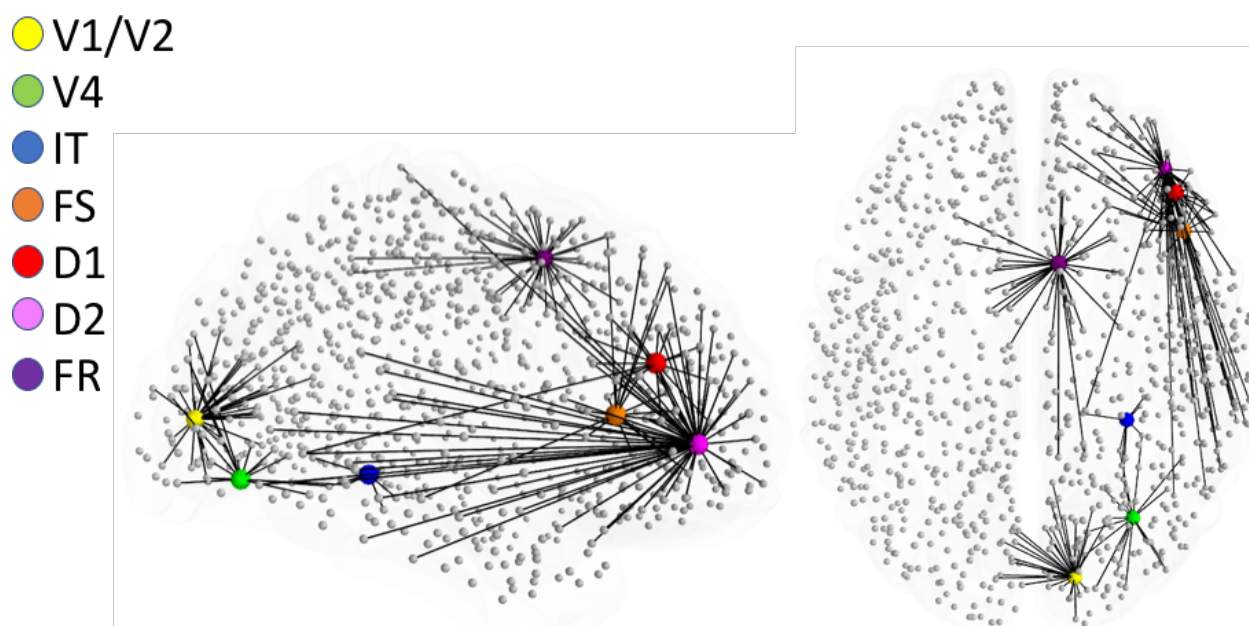

1002

1003 **Figure 2.** Graphical representation of the location where each of the visual short-term memory

1004 nodes was embedded within Hagmann's connectome ([Hagmann et al., 2008](#)). Also

1005 shown are direct anatomical connections to connectome nodes from each one of the

1006 embedded LSNM nodes.

1007

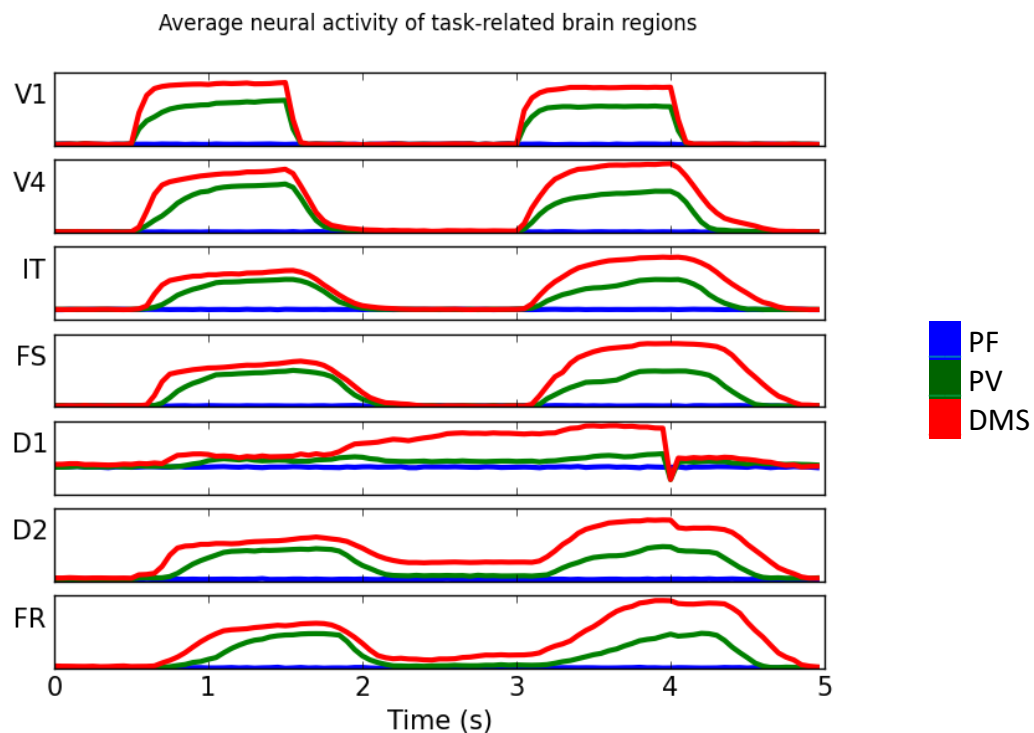

1008  
1009

1010 **Figure 3.** Typical electrical and in neuronal populations of task-related brain regions during one  
1011 trail of each of the simulated conditions. Key: PF (blue line), PV (green line), DMS (red line).  
1012 What is shown is the average across all cortical columns in a brain region.

1013

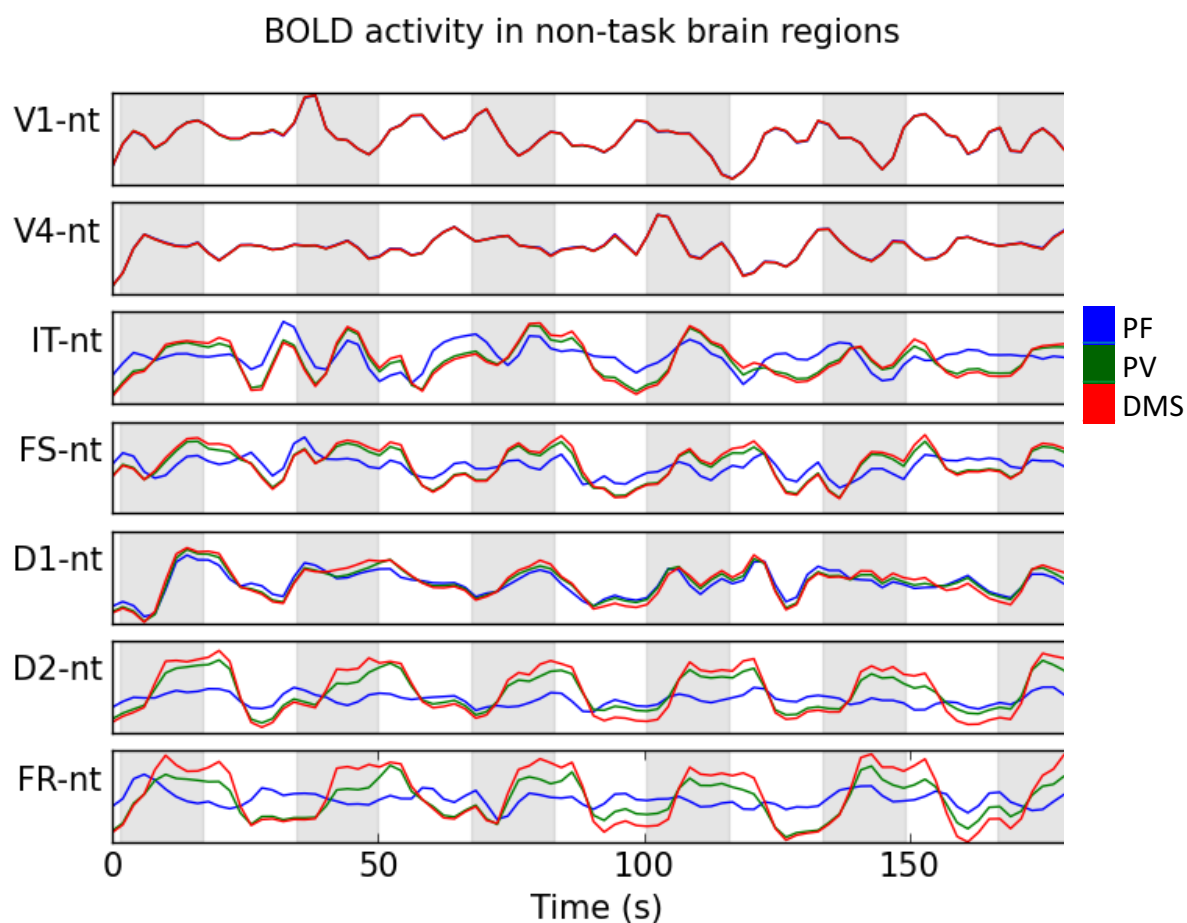

1014  
1015 Figure 4. Average BOLD signal of non-task brain regions with direct connections to task related  
1016 brain regions. A complete trial corresponding to 91 scans is shown above. for the PV and DMS  
1017 conditions, each experiment above contains 6 task blocks (shaded regions) interspersed with  
1018 rest blocks.

1019

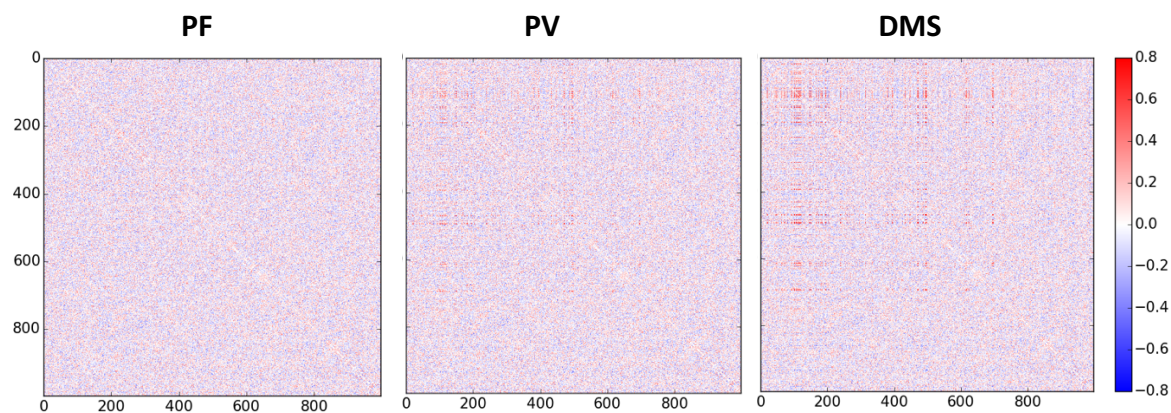

1020

1021

1022

1023

(A)

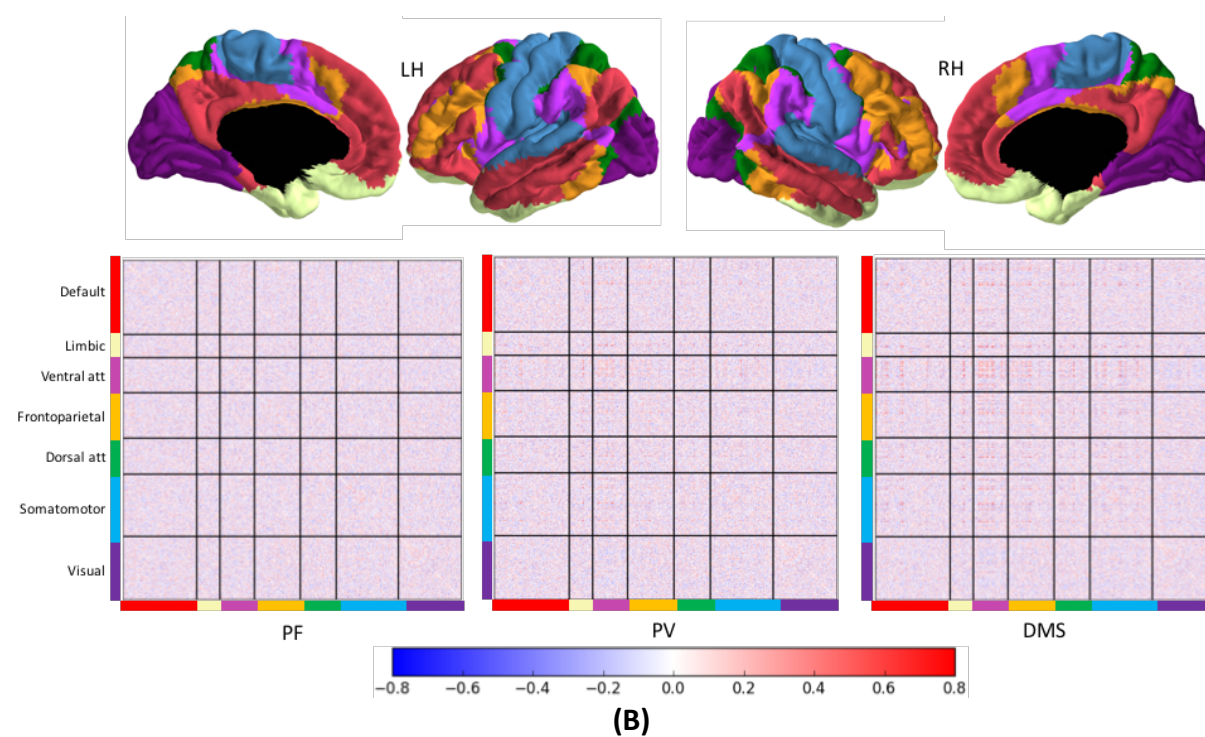

1024

1025

1026

1027

1028

1029

1030

1031

1032

**Figure 5.** Representative correlation-based functional connectivity matrices for the three conditions simulated. Subject 12 is shown above. (A) The nodes in each matrix are arranged using the standard connectome files in (Hagmann et al., 2008). (B) Nodes in the matrix have been rearranged to match Yeo et al (Yeo et al., 2011) parcellation (7 modules). Brain parcellation was displayed using Freesurfer.

1033

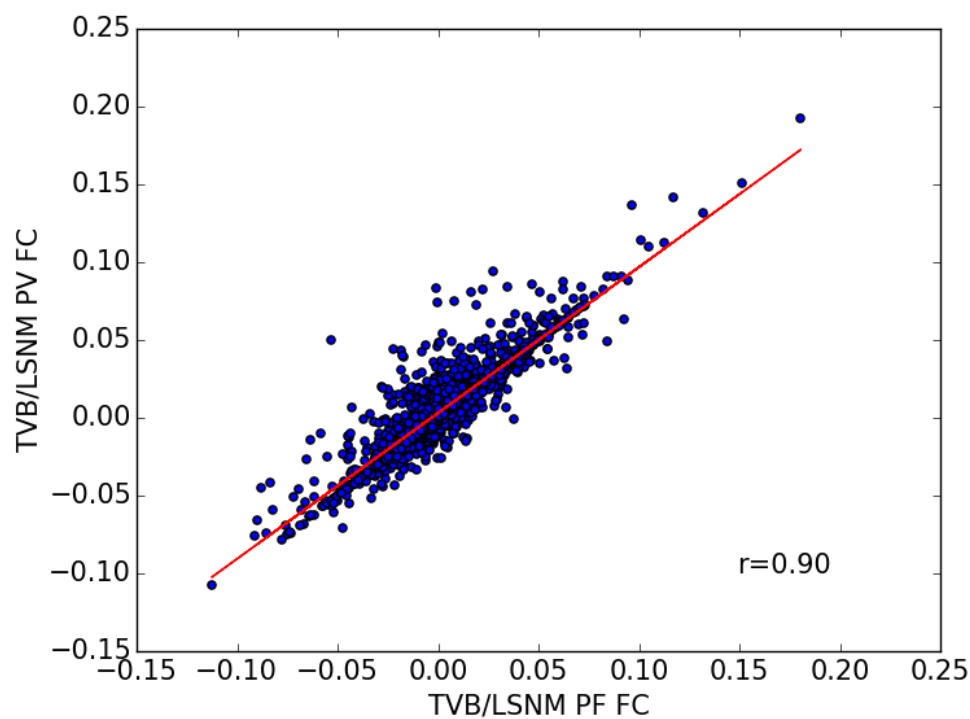

1034

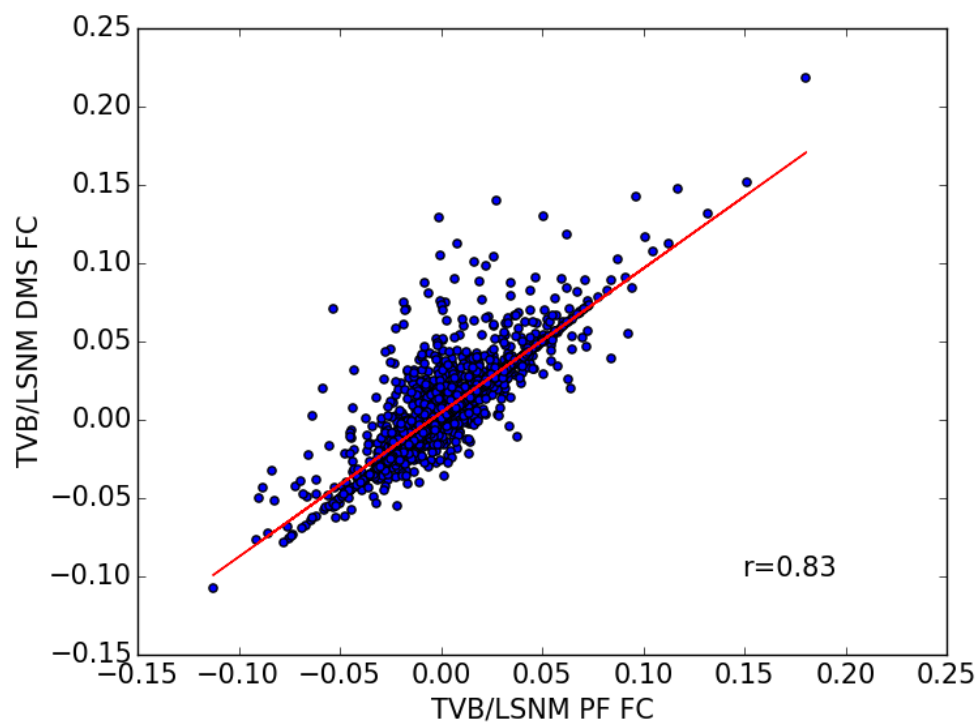

1035

1036

1037

1038

**Figure 6.** Correlation between PF and PV and between PF and DMS weighted functional connectivity matrices.



1039

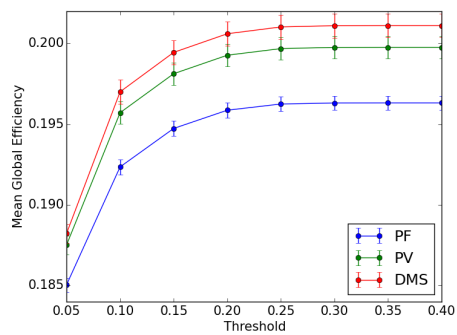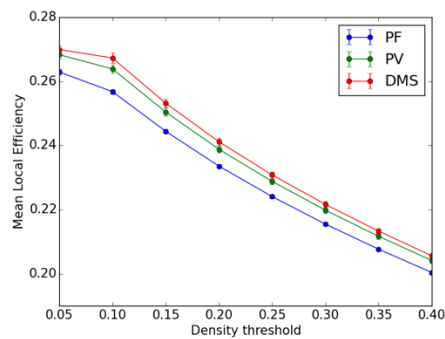

1040

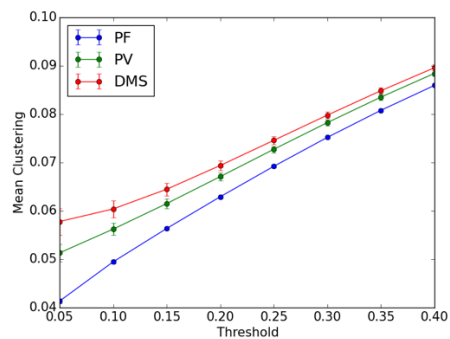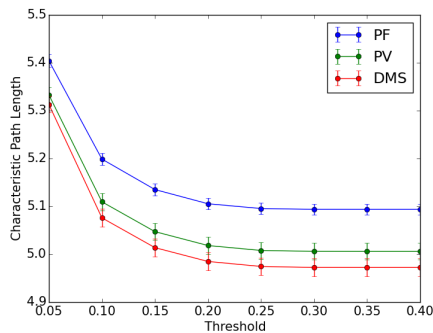

1041

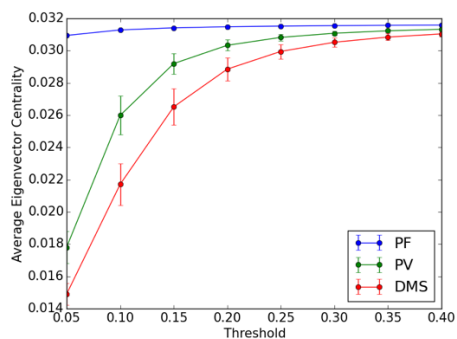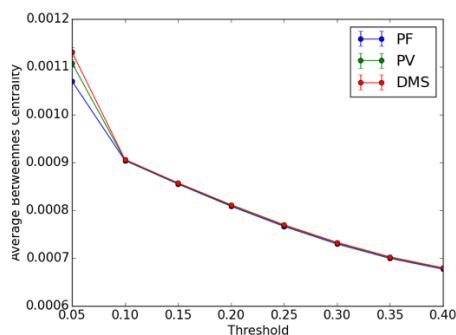

1042

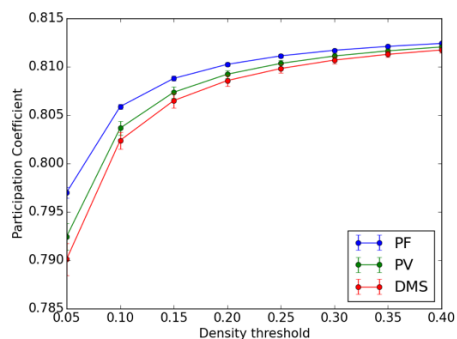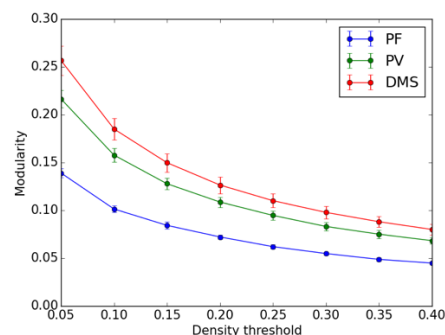

1043

**Figure 7.** Mean graph theoretical metrics for each condition and for a range of network densities (5 to 40%). Error bars correspond to standard deviation.

1044

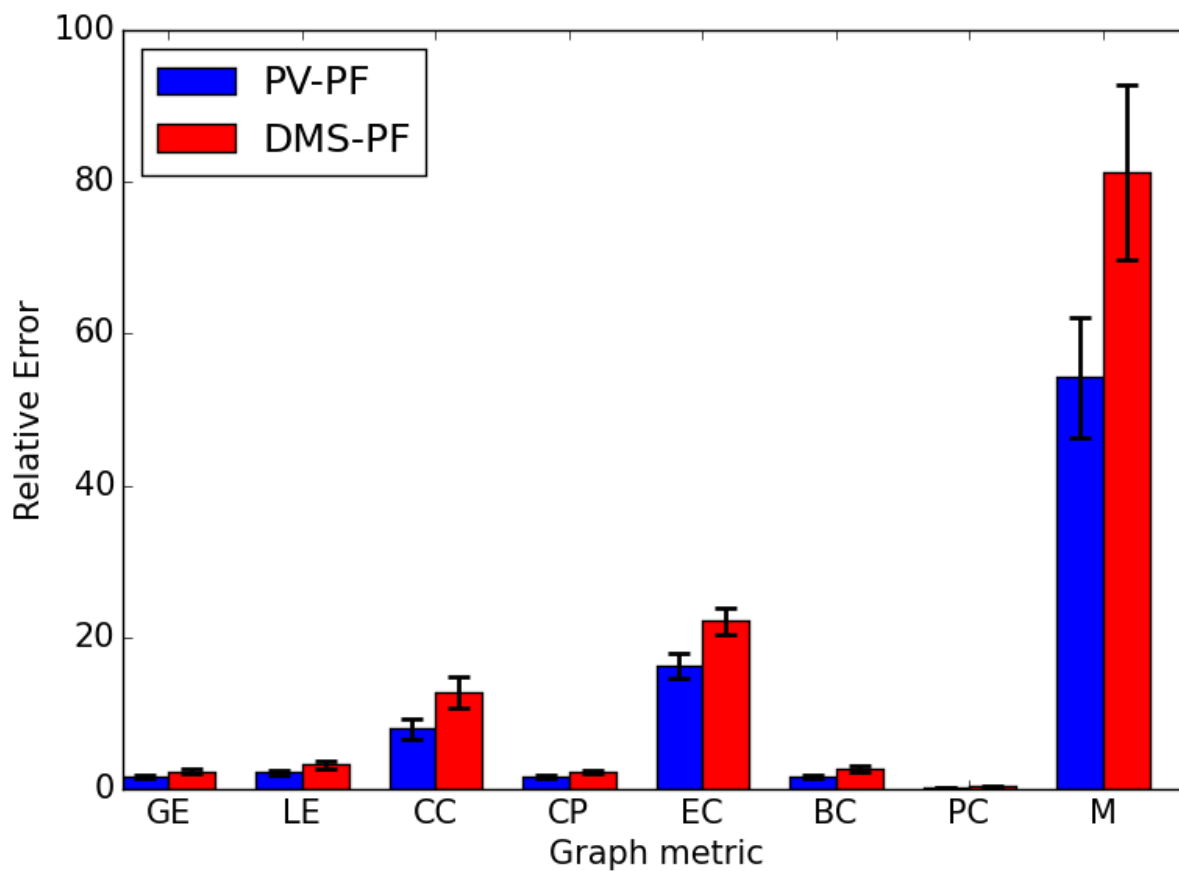

1045  
1046 **Figure 8.** Relative difference between PF and PV and between PF and DMS for each one of the  
1047 graph metrics in Figure 7. Error bars correspond to standard deviation.  
1048

1049



1050

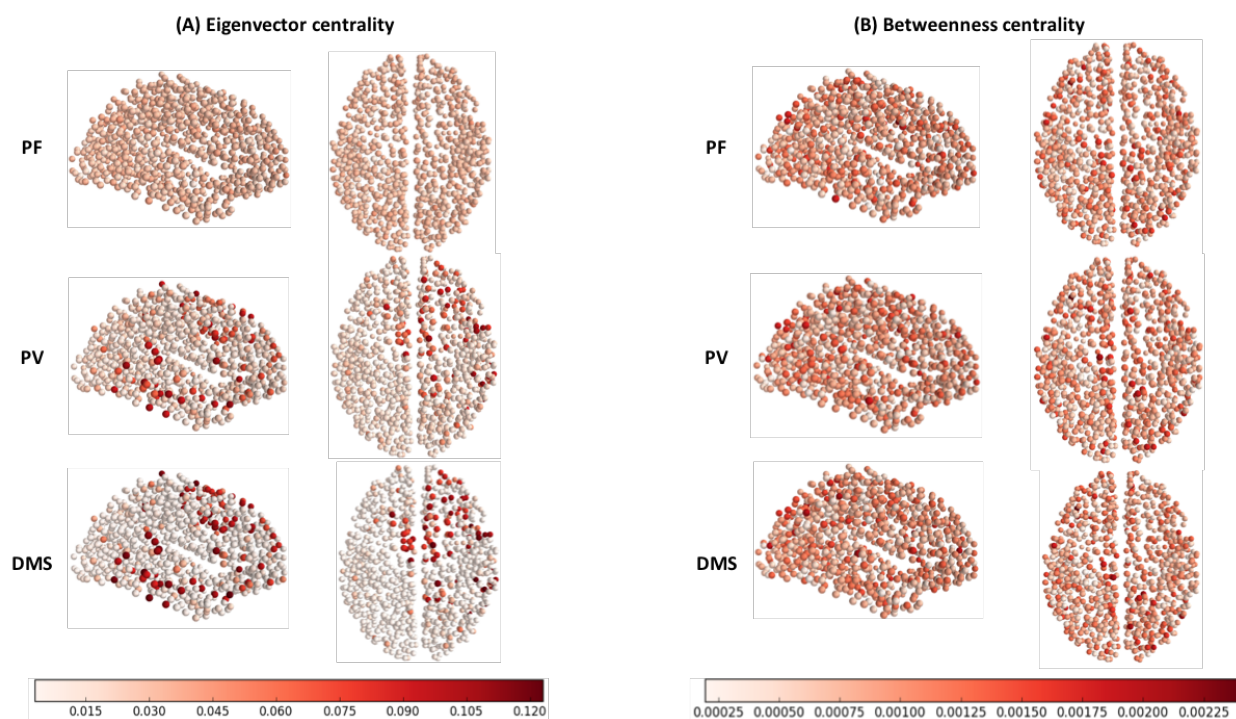

1051  
1052

1053 **Figure 9.** Eigenvector centrality (A) and betweenness centrality (B) depicted on a node-by-node  
1054 basis on sagittal (left) and axial (right) views of the brain. The density threshold used for the  
1055 depiction above was 10%.

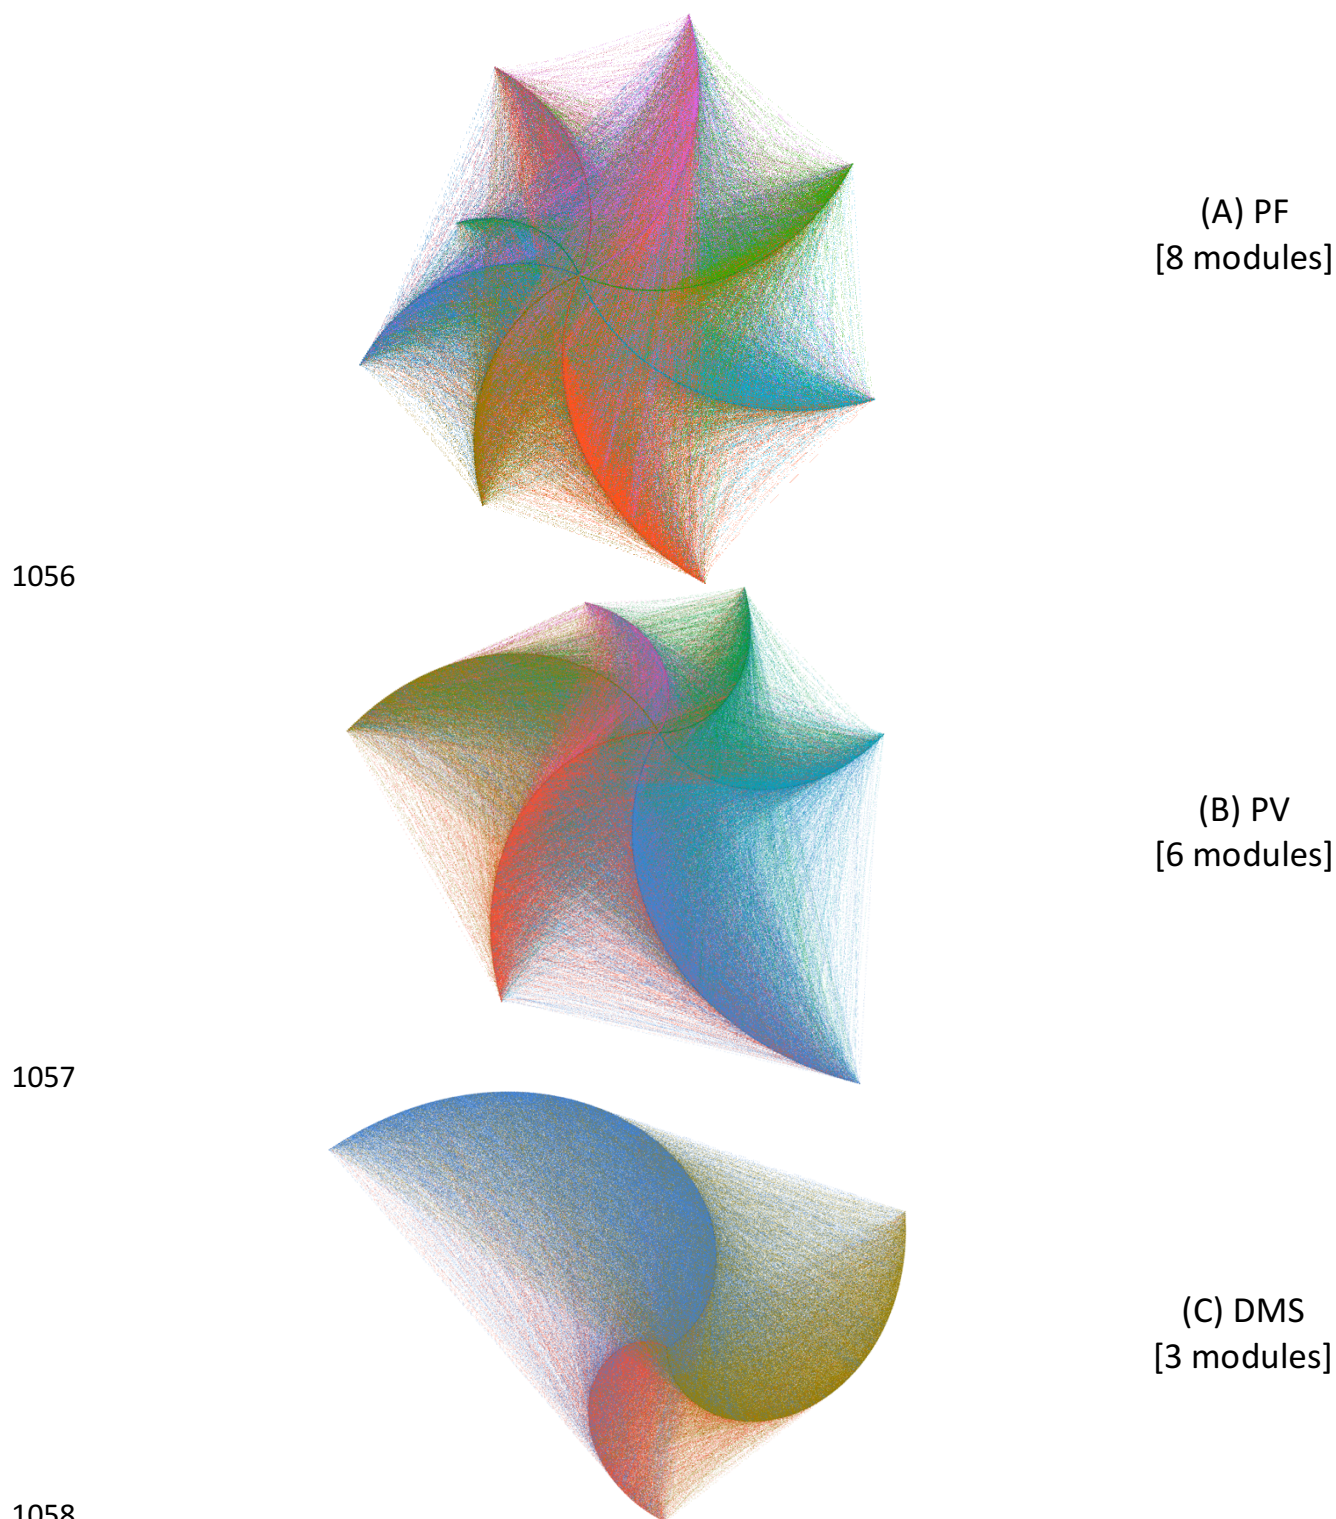

**Figure 10.** Modular structure of functional connectivity between non-task nodes in conditions (A) PF, (B) PV, and (C) DMS. The graphs used unweighted, undirected functional connectivity matrices at a density threshold of 10%. These graphs were rendered using the radial axis layout of Gephi ([Bastian et al., 2009](#)) and the modular structures were computed using the algorithm of ([Blondel et al., 2008](#)).

| Parameter  | Description                                              | Value |
|------------|----------------------------------------------------------|-------|
| $c_{EE}$   | Excitatory to excitatory weight                          | 12.0  |
| $c_{IE}$   | Inhibitory to excitatory weight                          | 4.0   |
| $c_{EI}$   | Excitatory to inhibitory weight                          | 13.0  |
| $c_{II}$   | Inhibitory to inhibitory weight                          | 11.0  |
| $\tau_E$   | Membrane time-constant, excitatory population            | 10.0  |
| $\tau_I$   | Membrane time-constant, inhibitory population            | 10.0  |
| $a_E$      | Slope of excitatory response function                    | 1.2   |
| $b_E$      | Position of maximum slope of excitatory sigmoid function | 2.8   |
| $c_E$      | Amplitude of excitatory response function                | 1.0   |
| $\theta_E$ | Excitatory threshold                                     | 0.0   |
| $a_I$      | Slope of inhibitory response function                    | 1.0   |
| $b_I$      | Position of maximum slope of inhibitory sigmoid function | 4.0   |
| $\theta_I$ | Inhibitory threshold                                     | 0.0   |
| $c_I$      | Amplitude of inhibitory response function                | 1.0   |
| $r_E$      | Excitatory refractory period                             | 1.0   |
| $r_I$      | Inhibitory refractor period                              | 1.0   |
| $k_E$      | Maximum value of excitatory response function            | 1.0   |
| $k_I$      | Maximum value of inhibitory response function            | 1.0   |
| $\alpha_E$ | Balance between excitatory and inhibitory                | 1.0   |
| $\alpha_I$ | Balance between excitatory and inhibitory                | 1.0   |

1064

1065 **Table S1.** Parameters used in the Wilson-Cowan equation for each connectome node within  
 1066 TVB. The parameters shown above are the default parameters within TVB and are also shown in  
 1067 Table 11(a) of ([Sanz-Leon et al., 2015](#)).

1068

1069

| Parameter                               | Value                   |
|-----------------------------------------|-------------------------|
| Number of nodes                         | 998                     |
| Global coupling strength                | 0.15                    |
| White matter transmission speed (mm/ms) | 3.0                     |
| Integrator                              | Euler stochastic (dt=5) |

1070

1071 **Table S2.** Parameters used for simulating the Hagmann et al. ([Hagmann et al., 2008](#))  
1072 connectome within the TVB resting state simulator. Please note the values of Global coupling  
1073 strength and white matter transmission speed above are different to those presented in ([Ulloa](#)  
1074 [& Horwitz, 2016](#)). In the present study we implemented a parameter search to better  
1075 reproduce empirical RS FC of ([Hagmann et al., 2008](#)). See methods sections for details.

1076

| <b>Parameter</b> | <b>E element</b> | <b>I element</b> |
|------------------|------------------|------------------|
| $K$              | 9.0              | 20.0             |
| $\phi$           | 0.3              | 0.1              |
| $N$              | $\pm 0.025$      | $\pm 0.025$      |
| $\Delta$         | 0.5              | 0.5              |
| $\delta$         | 0.5              | 0.5              |

1077

1078 **Table S3.** Parameters used in the Wilson-Cowan unit model of each LSNM submodule

1079

| Source | Destination | Fanout | Mean/SD                                                            | Percent to create | Comments                                                  |
|--------|-------------|--------|--------------------------------------------------------------------|-------------------|-----------------------------------------------------------|
| LGN    | V1          | 7x7    | 34 @ 0.003±0.003<br>2 x 5 @ 0.006 ± 0.003<br>1 x 5 @ 0.020 ± 0.002 | 100               | Highest values oriented either vertically or horizontally |
| V1h    | V4h         | 1x5    | 0.04 ± 0.01                                                        | 50                |                                                           |
| V1v    | V4v         | 5x1    | 0.04 ± 0.01                                                        | 50                |                                                           |
| V1h    | V4c         | 3x3    | 4 @ 0.0 ± 0.01<br>5 @ 0.02 ± 0.01                                  | 50                | Lowest values at the corners                              |
| V1v    | V4c         | 3x3    | 4 @ 0.0 ± 0.01<br>5 @ 0.02 ± 0.01                                  | 50                | Lowest values at the corners                              |
| V4     | IT          | 5x5    | 0.01 ± 0.01                                                        | 50                | Learned                                                   |
| IT     | FS          | 1x1    | 0.2 ± 0.02                                                         | 100               |                                                           |
| D2     | V4          | 5x5    | 0.0014 ± 0.0007                                                    | 100               |                                                           |
| D1     | IT          | 1x1    | 0.03 ± 0.001                                                       | 100               | Inhibitory                                                |
| D2     | IT          | 1x1    | 0.01 ± 0.002                                                       | 100               |                                                           |
| IT     | V4          | 4x4    | 0.00125 ± 0.0006                                                   | 100               |                                                           |

1080

1081 **Table S4.** Connection patterns among submodules of LSNM model

1082

| Source | Destination | Element | Weight |
|--------|-------------|---------|--------|
| FS     | D2          | E       | 0.07   |
| FS     | FR          | E       | 0.05   |
| D1     | FR          | E       | 0.06   |
| D1     | D2          | E       | 0.105  |
| D2     | D1          | E       | 0.10   |
| D1     | FS          | I       | 0.02   |
| FS     | D1          | I       | 0.05   |
| FR     | D1          | I       | 0.03   |
| FR     | D2          | I       | 0.065  |

1083

1084 **Table S5.** Connection weights among submodules in the prefrontal cortex region of LSM

1085

| Parameter     | Description                                             | Value | Reference                                                                    |
|---------------|---------------------------------------------------------|-------|------------------------------------------------------------------------------|
| $\tau_s$      | Rate constant of vasodilatory signal decay in seconds   | 1.54  | ( <a href="#">Heinzle, Koopmans, den Ouden, Raman, &amp; Stephan, 2016</a> ) |
| $\tau_f$      | Time of flow-dependent elimination in seconds           | 2.44  | ( <a href="#">Heinzle et al., 2016</a> )                                     |
| $\alpha$      | Grubb's vessel stiffness exponent                       | 0.32  | ( <a href="#">Heinzle et al., 2016</a> )                                     |
| $\tau_0$      | Hemodynamic transit time in seconds                     | 2.0   | ( <a href="#">Havlicek et al., 2015</a> )                                    |
| $\epsilon$    | Efficacy of synaptic activity to induce signal          | 0.1   | ( <a href="#">Friston et al., 2000</a> )                                     |
| $r_0$         | Slope of intravascular relaxation rate in Hertz         | 108.0 | ( <a href="#">Havlicek et al., 2015</a> )                                    |
| $\vartheta_0$ | Frequency offset at outer surface of magnetized vessels | 80.6  | ( <a href="#">Obata et al., 2004</a> )                                       |
| $\epsilon$    | Ratio of intra- and extravascular BOLD signal at rest   | 0.47  | ( <a href="#">Heinzle et al., 2016</a> )                                     |
| $V_0$         | Resting blood volume fraction                           | 0.02  | ( <a href="#">Obata et al., 2004</a> )                                       |
| $E_0$         | Resting oxygen extraction fraction                      | 0.34  | ( <a href="#">Heinzle et al., 2016</a> )                                     |
| $TE$          | Echo time                                               | 0.03  | ( <a href="#">Heinzle et al., 2016</a> )                                     |

1086

1087 **Table S6.** Parameters used for the Balloon model of hemodynamic response used in our

1088 simulations. Values are based on a 3T MRI magnet.
